1  
2  
3  
4  
5  
6  
7  
8  
9  
10  
11  
12  
13  
14  
15  
16  
17  
18  
19

**Munc18-1 catalyzes neuronal SNARE assembly by templating  
SNARE association**

Junyi Jiao,<sup>1</sup> Mengze He,<sup>1</sup> Sarah A. Port,<sup>2</sup> Richard W. Baker,<sup>2,3</sup> Yonggang Xu,<sup>1</sup> Hong Qu,<sup>1</sup> Yujian Xiong,<sup>1</sup> Yukun Wang,<sup>1</sup> Huaizhou Jin,<sup>1</sup> Travis J. Eisemann,<sup>2</sup> Frederick M. Hughson,<sup>2,\*</sup> Yongli Zhang<sup>1,\*</sup>

<sup>1</sup>Department of Cell Biology, Yale University School of Medicine, New Haven, CT 06520, USA.

<sup>2</sup>Department of Molecular Biology, Princeton University, Princeton, NJ 08544, USA.

<sup>3</sup>Current address: Department of Cellular and Molecular Medicine, University of California, San Diego, La Jolla, CA 92093, USA

\*Correspondence to: [yongli.zhang@yale.edu](mailto:yongli.zhang@yale.edu) or [hughson@princeton.edu](mailto:hughson@princeton.edu)

## 20 **Abstract**

21 **Sec1/Munc18-family (SM) proteins are required for SNARE-mediated membrane fusion,**  
22 **but their mechanism(s) of action remain controversial. Using single-molecule force**  
23 **spectroscopy, we found that the SM protein Munc18-1 catalyzes step-wise zippering of**  
24 **three synaptic SNAREs (syntaxin, VAMP2, and SNAP-25) into a four-helix bundle.**  
25 **Catalysis requires formation of an intermediate template complex in which Munc18-1**  
26 **juxtaposes the N-terminal regions of the SNARE motifs of syntaxin and VAMP2, while**  
27 **keeping their C-terminal regions separated. Next, SNAP-25 binds the templated SNAREs**  
28 **to form a partially-zippered SNARE complex. Finally, full zippering displaces Munc18-1.**  
29 **Munc18-1 mutations modulate the stability of the template complex in a manner consistent**  
30 **with their effects on membrane fusion, indicating that chaperoned SNARE assembly is**  
31 **essential for exocytosis. Two other SM proteins, Munc18-3 and Vps33, similarly chaperone**  
32 **SNARE assembly via a template complex, suggesting that SM protein mechanism is**  
33 **conserved.**

34

## 35 **Introduction**

36 Cytosolic SM proteins and membrane-anchored SNARE proteins constitute the core machinery  
37 that mediates nearly all intracellular membrane fusion (Rizo and Sudhof, 2012; Sudhof and  
38 Rothman, 2009). In particular, the neuronal SM protein Munc18-1 and its cognate SNAREs  
39 syntaxin-1, SNAP-25, and VAMP2 (also called synaptobrevin) drive fusion of synaptic vesicles  
40 with the presynaptic plasma membrane (Sollner et al., 1993; Verhage et al., 2000). Fusion  
41 releases neurotransmitters into synaptic or neuromuscular junctions, controlling all thoughts and  
42 actions. Related SM proteins, Munc18-2 and Munc18-3, are required for cytotoxin release from

43 lymphocytes to kill cancerous or infected cells (Cote et al., 2009) and for glucose uptake (Bryant  
44 and Gould, 2011), respectively. Consequently, dysfunctions of SM proteins are associated with  
45 neurological and immunological disorders, cancers, diabetes, and other diseases (Bryant and  
46 Gould, 2011; Cote et al., 2009; Stamberger et al., 2016).

47 SM proteins regulate the assembly of SNAREs into the membrane-bridging ‘trans-SNARE’  
48 complexes required for membrane fusion (Figure 1) (Baker and Hughson, 2016; Brunger et al.,  
49 2018; Gao et al., 2012; Rizo and Sudhof, 2012; Shen et al., 2007; Sudhof and Rothman, 2009;  
50 Sutton et al., 1998). Most SNAREs contain a C-terminal transmembrane anchor, an adjacent  
51 SNARE motif, and an N-terminal regulatory domain (NRD). SNARE motifs are 60-70 residues  
52 in length, with either glutamine (Q-SNAREs) or arginine (R-SNAREs) residues at a key central  
53 position (Fasshauer et al., 1998). SNARE motifs in isolation are intrinsically disordered. By  
54 contrast, they are  $\alpha$ -helical in fusion-competent SNARE complexes, with three Q-SNARE motifs  
55 (designated Qa, Qb, and Qc) and one R-SNARE motif combining to form a parallel four-helix  
56 bundle (Sutton et al., 1998). Despite its apparent simplicity, however, the physiological  
57 pathway(s) of SNARE assembly have remained enigmatic, as have the specific role(s) of SM  
58 proteins (Baker et al., 2015; Jakhanwal et al., 2017; Lai et al., 2017; Ma et al., 2013; Ma et al.,  
59 2015; Rizo and Sudhof, 2012; Shen et al., 2007; Wickner, 2010; Zhang et al., 2015; Zhou et al.,  
60 2013).

61 SNARE assembly has long been thought to begin with the formation of a t-SNARE complex  
62 among the SNAREs – usually Qa, Qb, and Qc – residing on the target membrane (Weber et al.,  
63 1998) (Figure 1). According to this view, the neuronal SNAREs syntaxin (Qa-SNARE) and  
64 SNAP-25 (Qbc-SNARE, a single protein containing both Qb and Qc SNARE motifs) assemble  
65 on the presynaptic plasma membrane, forming a t-SNARE complex that subsequently binds to

66 the synaptic vesicle R-SNARE VAMP2 (Jakhanwal et al., 2017; Pobbati et al., 2006; Shen et al.,  
67 2007; Weber et al., 1998; Zhang et al., 2016a). Recent reports have, however, raised doubts  
68 about this order of events. In vitro reconstitution experiments suggested that neuronal SNARE  
69 assembly begins with a complex between Munc18-1 and syntaxin, requires Munc13-1, and may  
70 not involve a syntaxin:SNAP-25 complex (Ma et al., 2013) (Figure 1). Crystal structures of the  
71 SM protein Vps33 bound to its cognate Qa- and R-SNARE implied that the SM protein functions  
72 as a template, orienting and aligning the two SNARE motifs for further assembly (Baker et al.,  
73 2015). Thus the Qa- and R-SNAREs might be the first to assemble, and only on the surface of an  
74 SM template.

75 Previously, we developed a single-molecule approach based on optical tweezers to dissect  
76 SNARE assembly at high spatiotemporal resolution (Gao et al., 2012; Ma et al., 2015; Zhang et  
77 al., 2016a; Zorman et al., 2014). Using this method, we measured the folding energy and kinetics  
78 of various SNARE complexes. Here, we extend the method to observe SM-mediated SNARE  
79 assembly. We detected three template complexes, each of them comprising an SM protein  
80 (Munc18-1, Munc18-3, or Vps33) bound to its cognate Qa- and R-SNAREs, and characterized  
81 the neuronal template complex in detail using a large panel of mutant proteins. Our results imply  
82 that the neuronal template complex is an on-pathway, rate-limiting intermediate in vitro and in  
83 vivo. They further suggest that phosphorylation of Munc18-1 can modulate the efficiency of  
84 neurotransmitter release by affecting the stability of the template complex. More broadly, our  
85 findings imply that membrane fusion in vivo may be controlled by SM proteins through their  
86 tunable catalytic activity as SNARE assembly chaperones.

87

## 88 **Results**

## 89 **Munc18-1, syntaxin, and VAMP2 form a template complex**

90 Previously, we found that the SM protein Vps33 forms binary complexes with the SNARE  
91 motifs of Vam3 (Qa-SNARE) and Nyv1 (R-SNARE), as well as a ternary ‘template complex’  
92 containing all three proteins (Baker et al., 2015). Crystal structures of the two binary complexes  
93 revealed that the Qa-SNARE and the R-SNARE bind to adjacent sites on the SM protein and led  
94 to a model of the template complex in which the two SNARE motifs are ‘half-zipped’. An  
95 analogous template complex might form during the assembly of the neurotransmitter release  
96 machinery (Sitarska et al., 2017), but direct evidence is lacking. To investigate further, we used  
97 an optical tweezers-based strategy to directly observe neuronal SNARE assembly and  
98 disassembly in the presence of Munc18-1. To mimic a trans-SNARE complex, pre-assembled  
99 SNAREs were attached via the C termini of the Qa- and R-SNARE motifs to beads (Gao et al.,  
100 2012). The same SNARE motifs were covalently linked near their N termini through an  
101 engineered disulfide bond to form a Qa-R-SNARE conjugate (Figure 2A & Figure 2-figure  
102 supplement 1). This tactic permitted us to conduct repeated rounds of force-induced  
103 unfolding/disassembly (‘pulling’) and potential refolding/assembly (‘relaxation’) in a single  
104 experiment.

105 Munc18-1 binds both the Qa-SNARE syntaxin (with nanomolar affinity) and the R-SNARE  
106 VAMP2 (with micromolar affinity) (Burkhardt et al., 2008; Misura et al., 2000; Parisotto et al.,  
107 2014; Sitarska et al., 2017). Formation of a ternary template complex has not, however, been  
108 reported. This is presumably because Munc18-1 and syntaxin, in their high-affinity complex,  
109 both adopt conformations that preclude VAMP2 binding (Baker et al., 2015; Misura et al., 2000;  
110 Sitarska et al., 2017) (Figure 2B). In particular, the SNARE motif and NRD of syntaxin interact  
111 to create an autoinhibited or ‘closed’ conformation (Misura et al., 2000). Opening syntaxin, and

112 thereby permitting SNARE assembly, requires Munc13-1 for a mechanism that remains  
113 controversial (Ma et al., 2011; Ma et al., 2013; Wang et al., 2017; Yang et al., 2015). To bypass  
114 the requirement for Munc13-1 in our single-molecule experiments, we attempted to destabilize  
115 the closed conformation of syntaxin without abolishing its interactions with Munc18-1 or the  
116 other SNAREs. Among the strategies we evaluated, the simplest was to form the Qa-R-SNARE  
117 conjugate by crosslinking syntaxin R198C and VAMP2 N29C (Figure 2A, solid arrowhead;  
118 Figure 2-figure supplement 1). In closed syntaxin, residue 198 is buried against the NRD (Figure  
119 2B). As shown below, involving this residue in a disulfide bond destabilized and partially opened  
120 Munc18-bound syntaxin, presumably via localized unfolding.

121 We began by pulling the fully folded neuronal SNARE complex, containing crosslinked  
122 syntaxin and VAMP2 as well as SNAP-25B, in the absence of Munc18-1. The resulting force-  
123 extension curve (FEC) revealed that, as expected based on our previous work (Gao et al., 2012;  
124 Ma et al., 2015), the SNARE complex disassembled in at least three steps (Figure 2C, FEC #1,  
125 gray curve). These force-induced disassembly steps are schematically depicted in Video 1 and in  
126 Figure 2D as transitions from states  $1 \leftrightarrow 2 \rightarrow 3 \rightarrow 4$ .  $1 \leftrightarrow 2$  represents reversible unfolding of the C-  
127 terminal half of the VAMP2 SNARE motif (CTD; Figure 2C, gray oval),  $2 \rightarrow 3$  represents  
128 irreversible unfolding of the N-terminal half of the VAMP2 SNARE motif (NTD; gray arrow),  
129 and  $3 \rightarrow 4$  represents irreversible unfolding of the syntaxin SNARE motif (black arrow).  $3 \rightarrow 4$   
130 was accompanied by release of SNAP-25B. Relaxing the resulting Qa-R-SNARE conjugate  
131 revealed a featureless FEC, as expected for an unfolded polypeptide (Figure 2C, FEC #1, black  
132 curve) (Gao et al., 2012; Ma et al., 2015).

133 We next asked whether our single-molecule assay could be used to detect and characterize  
134 the predicted template complex (Figure 2A). The addition of 2  $\mu$ M Munc18-1 had little effect on

135 the unfolding pathway of the initial syntaxin/VAMP2/SNAP-25B complex (Figure 2C, compare  
136 gray curves in FEC #1 and #2; Video 1). However, the presence of Munc18-1 had a striking  
137 effect on the FEC of the remaining Qa-R-SNARE conjugate. Specifically, relaxing (Figure 2C,  
138 #2, black trace) and then pulling (Figure 2C, #3, blue trace) the Qa-R-SNARE conjugate  
139 revealed two Munc18-1-dependent features (Figure 2-figure supplement 2). In about 40% of the  
140 FECs, we observed a small flickering signal at 10-15 pN (Figure 2C, #2 in blue rectangle; Figure  
141 2-figure supplement 3). We attribute this transition (5 $\leftrightarrow$ 6) to the reversible folding/unfolding of  
142 the partially closed syntaxin conformation induced by Munc18-1 (state 6 in Figure 2D). More  
143 importantly, in about 50% of the FECs, we observed prominent flickering signals at 3-7 pN  
144 (Figure 2C, #2-3, blue ovals). As described in detail below, extensive evidence supports the  
145 conclusion that this transition (6 $\leftrightarrow$ 7) results from the reversible, cooperative formation and  
146 unfolding of the predicted template complex (Figure 2A; state 7 in Figure 2D). For example, the  
147 probability of observing the 6 $\leftrightarrow$ 7 transition was greatly reduced when either the Munc18-  
148 1:VAMP2 interaction or the Munc18-1:syntaxin interaction was abrogated (Burkhardt et al.,  
149 2008; Parisotto et al., 2014) (Figure 2C, #4-5; Table 1).

150

### 151 **Stability and conformation of the template complex**

152 To examine the stability and folding/unfolding kinetics of the template complex, we monitored  
153 the 6 $\leftrightarrow$ 7 transition over a range of constant mean forces (Figure 3A-C; Video 2). Detailed  
154 analyses of the extension trajectories (Figure 3A) revealed the force-dependent unfolding  
155 probability and transition rate of the template complex (Figure 3C) and, by extrapolation to zero  
156 force (Gao et al., 2012; Rebane et al., 2016), its unfolding energy ( $5.2 \pm 0.1$  k<sub>B</sub>T or  $3.1 \pm 0.1$   
157 kcal/mol; mean  $\pm$  SEM) and lifetime (1.4 s) (Figure 3B). Comparable analysis of the

158 folding/unfolding of the partially closed syntaxin (5 $\leftrightarrow$ 6) allowed us to estimate its unfolding  
159 energy as well ( $2.6 \pm 0.2$  k<sub>B</sub>T; Figure 2-figure supplement 4). The total extension change  
160 associated with these transitions (5 $\rightarrow$ 6 $\rightarrow$ 7) is consistent with a structural model of the template  
161 complex based on the crystal structures of Vps33:Nyv1 and Vps33:Vam3 (Baker et al., 2015)  
162 (Figure 2A). Importantly, the same template complex was observed when we used an alternative  
163 Qa-R-SNARE crosslinking site at syntaxin I187C and VAMP2 N29C, but only in conjunction  
164 with additional NRD mutations E76K, L165A, and E166A to destabilize the closed conformation  
165 of syntaxin (Figure 2C, #7; Figure 2B; Figure 2-figure supplement 5-7). Thus, observation of the  
166 template complex was independent of the crosslinking site, requiring only that the closed  
167 conformation be destabilized (Hu et al., 2011).

168 We used a battery of mutant proteins to test our structural model of the template complex in  
169 greater detail (Figure 2A). A salient feature of the model is the pivotal role played by a pair of  $\alpha$ -  
170 helices (a.a. 298-359) within domain 3a of Munc18-1 (Baker et al., 2015; Sitarska et al., 2017)  
171 (yellow in Figure 2A,B). These  $\alpha$ -helices form an extended helical hairpin that interacts  
172 extensively with the NTD of syntaxin and with both the NTD and the CTD of VAMP2 (Figure  
173 2A & Figure 2-figure supplement 1). Many domain 3a mutations within (L307R, P335L, L341P,  
174 L348R) or adjacent (L247R, T248G) to the helical hairpin destabilized the template complex  
175 (Figures 3D, 4, & Figure 3-figure supplement 1; Table 1 and references therein). An internal  
176 deletion that removes the distal portion of the helical hairpin (Munc18-1  $\Delta$ 324-339) abolished  
177 formation of the template complex altogether. Notably, two helical hairpin mutations – D326K  
178 and P335A – actually stabilized the template complex; both of these mutations are associated  
179 with enhanced Munc18-1 function in vitro and in vivo (Munch et al., 2016; Parisotto et al., 2014;  
180 Sitarska et al., 2017). Three phosphomimetic mutations (S306D, S313D, and Y347D) are



181 discussed later. None of the mutations we tested had a significant effect on the overall structure  
182 of Munc18-1 as judged by circular dichroism (Figure 3-figure supplement 2). Overall, the  
183 consequences of Munc18-1 mutations are consistent with our structural model.

184 Reciprocally, we investigated the impact of SNARE motif mutations that appeared likely to  
185 affect the SNARE:Munc18-1 interface. Although VAMP2 M46A did not have a significant  
186 effect, the rest (syntaxin F216A, I230G/D231/R232G, and I233G/E234G/Y235G; VAMP2  
187 S61D/E62T, E62T, Q76A, and F77A) all destabilized the template complex (Figures 3E & 4;  
188 Table 1; Figure 3-figure supplement 1). Interestingly, all three syntaxin mutations abolished the  
189 partially closed syntaxin (Table 1), implying that the template complex and the closed syntaxin  
190 share some interactions between syntaxin and Munc18-1. The VAMP2 residue Phe 77, located at  
191 the so-called +6 layer (Figure 2-figure supplement 1), appears to play an especially important  
192 role. In our model of the template complex, the side chain of Phe 77 inserts into a deep,  
193 hydrophobic pocket in domain 3a, with Leu 247 and Thr 248 residues at the bottom (Figure 3F).  
194 Phe 77 is highly conserved among R-SNAREs, whereas Leu 247 and Thr 248 are highly  
195 conserved among SM proteins (Figure 3G). Substituting Phe 77 with Ala dramatically reduced  
196 the formation probability of the template complex to 0.06 and its unfolding energy to  $1.5 \pm 0.3$   
197  $k_B T$ , the lower limit of our assay (Figure 2C, #6; Figure 3E). Similarly, Munc18-1 mutations in  
198 the hydrophobic pocket strongly impaired (for L247R or T248G) or totally abolished (for L247A  
199 and T248G together) formation of the template complex (Figure 4; Table 1). Taken together, our  
200 mutagenesis results confirm that the stability of the template complex depends on extensive  
201 interactions between Munc18-1 and the two SNARE motifs, including a key anchoring role for  
202 the +6 layer Phe of VAMP2.

203 In the binary Vps33:SNARE crystal structures we reported previously (Baker et al., 2015),  
204 only the central regions of each SNARE motif (Qa-SNARE layers -4 to +3; R-SNARE layers -4  
205 to +6) contact the SM template, whereas both ends of each SNARE motif are likely disordered.  
206 In the ternary template complex, however, the two SNARE motifs may be correctly zippered all  
207 the way to their N-termini. First, -7 layer mutations (VAMP2 L32G/L33G or syntaxin  
208 I202G/I203G) destabilized the template complex, as did a -5 layer mutation (VAMP2 V39D)  
209 (Figure 3E,I; Figure 4; Table 1). Second, crosslinking the SNAREs at the -6 layer (via syntaxin  
210 L205C and VAMP2 Q36C; open arrowhead in Figure 2A; Figure 2-figure supplement 1) (Ma et  
211 al., 2015) enhanced the probability of observing the template complex to 0.93 (Figure 2C, #8;  
212 Figure 3H). Taken together, these data suggest that the -6 layer is properly aligned in the  
213 template complex and that the N-terminal regions from layers -7 to -5 – which are unlikely to  
214 contact Munc18-1 but nevertheless contribute to the stability of the complex – are correctly  
215 zippered (Figure 2A). By contrast, altering C-terminal regions of the SNARE motifs (VAMP2  
216 A81G/A82G or  $\Delta$ 85-94; syntaxin V237G/E238G/H239G, T251G/K252G, or  $\Delta$ 255-264) did not  
217 affect the stability of the template complex (Figure 4 and Table 1). Thus syntaxin regions C-  
218 terminal to the +3 layer, and VAMP2 regions C-terminal to the +6 layer, are likely disordered in  
219 the template complex.

220

### 221 **Template complex facilitates SNARE assembly**

222 To investigate a potential role for the template complex in SNARE assembly, we repeatedly  
223 relaxed and pulled the neuronal Qa-R-SNARE conjugate in the presence of SNAP-25B and,  
224 where indicated, Munc18-1. During relaxation, we held the Qa-R-SNARE conjugate at constant  
225 mean forces around the equilibrium force of the template complex (Table 1) for up to 60 seconds

226 to afford an opportunity for SNAP-25B binding and SNARE assembly. In the presence of 60 nM  
227 SNAP-25B but no Munc18-1, the SNAREs rarely assembled, with a probability of only 0.08 per  
228 relaxation (Figure 5A, #1; Figure 5B). Increasing the SNAP-25B concentration to 200 nM  
229 increased the assembly probability to 0.41 (Figure 5C, #2-4; Figure 5B). This ‘spontaneous’ (i.e.,  
230 Munc18-1-independent) SNARE assembly occurred in an all-or-none fashion in the force range  
231 of 2-4 pN (Figure 5D, a). Notably, SNAREs misassembled in the absence of Munc18-1 with a  
232 probability of ~0.1, as judged by premature unfolding at low force upon subsequent pulling  
233 (Figure 5C, #5; Figure 5B).

234 The addition of 2  $\mu$ M Munc18-1 increased the frequency of SNARE assembly to 0.53 and  
235 0.68 per relaxation in the presence of 60 nM and 200 nM SNAP-25B, respectively (Figure 5A,  
236 #2-#5; Figure 5C, #6). Every SNARE assembly event was preceded by the formation of an  
237 intermediate state (Figure 5D, b-e; Video 2; Figure 5B; Table 1). This intermediate had the same  
238 average extension relative to the unfolded state, the same equilibrium force, and the same  
239 response to mutations as the template complex (Figure 5A, #6-7; Figure 5D, f; Figure 5-figure  
240 supplement 1,2). We conclude that in the presence of Munc18-1, the pre-assembled template  
241 complex is required for SNAP-25B binding and SNARE assembly.

242 The template complex greatly accelerated proper SNARE assembly. SNAP-25B bound to the  
243 template complex with probabilities of 0.71 and 0.84 per relaxation at 60 nM and 200 nM  
244 SNAP-25B, respectively, yielding a binding rate constant of  $\sim 5 \times 10^5 \text{ M}^{-1}\text{s}^{-1}$ . The rate constant is  
245 25-fold greater than that observed in the absence of Munc18-1 ( $\sim 2 \times 10^4 \text{ M}^{-1}\text{s}^{-1}$ ), presumably  
246 because Munc18-1 pre-aligns the N-terminal portions of the syntaxin and VAMP2 SNARE  
247 motifs for recognition by SNAP-25B. Consistent with this view, the VAMP2 -7 layer mutations  
248 L32G/L33G nearly abolished SNAP-25B binding (Table 1). Notably, we did not observe any

249 misassembly events in the presence of Munc18-1 (Figure 5B). Thus, Munc18-1 enhanced the  
250 speed, and probably the accuracy, of SNARE assembly.

251

### 252 **N-terminal regulatory domain of syntaxin stabilizes template complex**

253 Once initiated, the reversible template complex transition ( $6 \leftrightarrow 7$ ) typically persisted for over ten  
254 minutes at constant mean force, even after the free Munc18-1 in the solution was removed. We  
255 suspected that the persistent association between Munc18-1 and the Qa-R-SNARE conjugate  
256 was attributable to the NRD of syntaxin, as suggested by previous results (Burkhardt et al., 2008;  
257 Shen et al., 2010; Shen et al., 2007; Zhou et al., 2013). Indeed, NRD truncation ( $\Delta$ NRD) reduced  
258 the probability of observing template complex formation from 0.5 to 0.08 (Figure 2C, #5),  
259 consistent with the idea that the NRD recruits Munc18-1. The average lifetime of the template  
260 complex formed by  $\Delta$ NRD was also shorter (Figure 3I & Figure 3-figure supplement 3),  
261 indicating that the NRD stabilizes the template complex. Unexpectedly, addition of 2  $\mu$ M NRD  
262 in trans was able to rescue the defect: the template complex now formed efficiently (probability  
263 = 0.6, N=35) at an equilibrium force close to that of the WT template complex, albeit with  
264 slower transition kinetics (Figure 3I). Thus, the NRD can bind to and stabilize the template  
265 complex in trans.

266 Next, we dissected the roles of different NRD regions. Removing the ‘N-peptide’ at the  
267 extreme N-terminus of the NRD (Figure 2B) destabilized the template complex (Figures 3I & 4;  
268 Table 1), while removing the three-helix bundle  $H_{abc}$  domain abolished template complex  
269 formation altogether (Table 1). By contrast the ‘LE’ mutation (L165A/E166A in the linker  
270 region between the  $H_{abc}$  domain and the SNARE motif; see Figure 2B) (Dulubova et al., 1999),  
271 which promoted SNARE assembly (Table 1) as expected (Burkhardt et al., 2008; Gerber et al.,

272 2008; Ma et al., 2011; Richmond et al., 2001), stabilized the template complex (Figure 3I).  
273 Taken together, our results imply that the NRD has a three-fold role in template complex  
274 formation (Video 3). When syntaxin is closed (state 6' in Figure 2B), the NRD inhibits template  
275 complex formation (Figure 2-figure supplement 5), as also shown previously (Burkhardt et al.,  
276 2008). When syntaxin is partially open (state 6 in Figure 2D), the NRD recruits Munc18-1 for  
277 fast folding of the template complex. Finally, once the template complex has formed (state 7 in  
278 Figure 2D), the NRD plays a direct stabilizing role. The structural basis for this stabilizing role  
279 awaits further investigation.

280

### 281 **Munc18-1 inhibits t-SNARE complex formation**

282 SNARE complex formation in the absence of Munc18-1 was relatively efficient when SNAP-  
283 25B was present at high concentrations, as noted above. The addition of Munc18-1, however,  
284 reduced the probability of spontaneous SNARE assembly (i.e., assembly not preceded by  
285 template complex formation) to 0.04 (Figure 5B). Thus, Munc18-1 not only promotes SNARE  
286 assembly via the template complex, but also inhibits spontaneous SNARE assembly. Using a  
287 very similar experimental approach, we previously showed that spontaneous SNARE assembly  
288 proceeds by a different route (Gao et al., 2012; Zhang et al., 2016a). First, syntaxin binds SNAP-  
289 25B to form a t-SNARE complex; then, VAMP2 assembles with the t-SNARE complex in a  
290 process called t-v zippering (Gao et al., 2012; Zhang et al., 2016a). In the presence of Munc18-1,  
291 t-SNARE complexes were never observed. Thus, Munc18-1 appears to inhibit spontaneous  
292 SNARE assembly by suppressing formation of the t-SNARE complex intermediate.

293 We find that Munc18-1 accelerates SNARE assembly by means of an on-pathway template  
294 complex intermediate. A previous model instead proposed that Munc18-1 accelerates t-v

295 zippering (Dawidowski and Cafiso, 2016; Jakhanwal et al., 2017; Shen et al., 2007; Zhang et al.,  
296 2016a). To address this possibility directly, we pulled ternary SNARE complexes to generate the  
297 t-SNARE complex (state 3) in the presence of 2  $\mu\text{M}$  soluble VAMP2 (Figure 7A). The free  
298 VAMP2 molecule rapidly bound the t-SNARE complex (Figure 7B,C), with a binding rate  
299 constant ( $1.6 \times 10^6 \text{ M}^{-1}\text{s}^{-1}$ ) close to a previously published value ( $0.5 \times 10^6 \text{ M}^{-1}\text{s}^{-1}$ ) (Pobbati et al.,  
300 2006). The binding constant was little changed ( $2.0 \times 10^6 \text{ M}^{-1}\text{s}^{-1}$ ) by the addition of 2  $\mu\text{M}$   
301 Munc18-1. The average t-v zippering force was  $\sim 10$  pN with or without Munc18-1 (Figure 5C,  
302 #1, blue arrow). Thus, Munc18-1 did not significantly promote t-v zippering.

303

#### 304 **Munc18-1 stabilizes the SNARE complex in a partially-zippered state**

305 All of our experiments began with a properly folded SNARE complex (state 1). As noted above,  
306 we could drive cycles of disassembly and reassembly by repeatedly pulling and relaxing the Qa-  
307 R-SNARE conjugate in the presence of SNAP-25B and Munc18-1. In most cases, the  
308 disassembly FECs of the reassembled SNARE complexes were indistinguishable from those of  
309 the initial SNARE complexes (Figure 5A, compare #4-5 to #2), suggesting that complete  
310 SNARE zippering led to Munc18-1 release (Figure 2D, from state 7 to 1). 14% of the time,  
311 however, pulling a reassembled SNARE complex revealed reversible unfolding of the VAMP2  
312 CTD at an unusually low force (4-14 pN, versus 16.5 pN for the initial pull, see blue curves in  
313 Figure 5A, #3 & #8). Apparently Munc18-1 was still bound to the assembled SNARE complex  
314 (Figure 2D, state 9) (Dulubova et al., 2007); moreover, the unreleased Munc18-1 seemed to  
315 stabilize a new partially zippered state (state 8) containing SNAP-25B (Ma et al., 2015). The  
316 pulling FEC would therefore be interpreted, in terms of Figure 2D, as  $9 \leftrightarrow 8 \rightarrow 3 \rightarrow 4$ .

317 Occasionally, state 8 was observed at constant mean force (Figure 5A, #8; Figure 5D, g;  
318 Video 4). In these cases, reversible template complex formation ( $6 \leftrightarrow 7$ ) was followed by  
319 reversible CTD folding ( $8 \leftrightarrow 9$ ). The  $7 \rightarrow 8$  transition, representing SNAP-25B binding to the  
320 template complex, was apparently irreversible. The extension decrease associated with the  $7 \rightarrow 8$   
321 transition was small but significant, implying that the binding of SNAP-25B to the template  
322 complex causes additional zippering of syntaxin and VAMP2. The detailed structure of state 8  
323 awaits further investigation.

324 We predicted that the frequency with which state 8 is observed would be increased by  
325 impeding full SNARE zippering and thereby Munc18-1 release. In accord with this prediction, a  
326 9-residue C-terminal truncation of SNAP-25B, which removes layers +7 and +8 of the Qc-  
327 SNARE motif and mimics its cleavage by botulinum neurotoxin A (Sutton et al., 1998),  
328 increased the probability of detecting state 8 from 0.04 to 0.3 (Figure 5D, h). Along similar lines,  
329 we reported recently that the SNAP25B mutations I67N and I67T, both of which alter the +4  
330 layer residue of the Qb-SNARE motif, destabilize SNARE CTD zippering (Rebane et al., 2018).  
331 Replacing WT SNAP-25B with either mutant increased the probability of observing state 8 to  
332  $\sim 0.4$  (Figure 6B, g). Taken together, our results establish that SNAP-25B binding to the template  
333 complex (state 7) leads to the formation of a partially zippered complex containing all three  
334 SNAREs and Munc18-1 (state 8), and that the completion of zippering usually expels Munc18-1.  
335

### 336 **Function-altering and phosphomimetic mutations**

337 In examining a large number of SNARE and SM mutations (Figure 4 and Table 1), we found that  
338 modifications known to compromise SNARE assembly, membrane fusion, and/or  
339 neurotransmitter release (Munch et al., 2016; Parisotto et al., 2014; Shen et al., 2007; Walter et

340 al., 2010; Zhou et al., 2013) invariably destabilized the template complex (Figure 4, red bars).  
341 Munc18-1 I341P and P335L are, along with SNAP25B I67N and I67P discussed above, four  
342 examples of hundreds of Munc18-1 and SNARE mutations associated with epilepsy and other  
343 disorders (Stamberger et al., 2016). P335L destabilized, and I341P abrogated altogether, the  
344 template complex, leading to impaired Munc18-1-chaperoned SNARE assembly (Figure 4,  
345 purple bars; Figure 6A, #7-8; Figure 6B, f). Conversely, mutations known to increase SNARE  
346 assembly, membrane fusion, and/or neurotransmitter release (Genc et al., 2014; Gerber et al.,  
347 2008; Munch et al., 2016; Parisotto et al., 2014; Sitarska et al., 2017) displayed enhanced  
348 template complex stability (Figure 4, green bars). This correlation establishes that the template  
349 complex is an important intermediate for membrane fusion *in vivo*.

350 The phosphorylation of Munc18 proteins regulates neurotransmitter release and insulin  
351 secretion (Genc et al., 2014; Meijer et al., 2018). To explore the mechanism(s) underlying these  
352 observations, we examined three phosphomimetic mutations. Phosphorylation of domain 3a  
353 residues Ser 306 and Ser 313 (Figure 2A-B) enhances neurotransmitter release and contribute to  
354 short-term memory (Genc et al., 2014). Correspondingly, the phosphomimetic mutations S306D  
355 and S313D each stabilized the template complex (Figure 4, arrows; Figure 6) and increased the  
356 probability of template formation (Table 1). Conversely, the phosphomimetic mutation Y473D,  
357 which abrogates membrane fusion *in vivo* (Meijer et al., 2018), destabilized the template  
358 complex (Figures 4 & 6) and reduced the probability of template formation (Table 1). Tyr 473 is  
359 located immediately adjacent to the predicted binding pocket for the +6 layer Phe of VAMP2  
360 (Figure 3F) and likely plays a key role in VAMP2 binding. Taken together, these results suggest  
361 that Munc18-1 phosphorylation regulates synaptic vesicle fusion by modulating the stability of  
362 the template complex.



363

364 **Template mechanism is conserved among SM proteins**

365 To generalize our findings, we investigated two other SM proteins, Munc18-3 and Vps33 (Figure  
366 2-figure supplement 1). Munc18-3 and its cognate SNAREs syntaxin 4 (Qa), VAMP2 (R), and  
367 SNAP-23 (Qbc) mediate fusion of glucose transporter 4- (GLUT4-) containing vesicles with the  
368 plasma membrane, promoting glucose uptake (Bryant and Gould, 2011). Vps33 and its cognate  
369 vacuolar SNAREs Vam3 (Qa), Nyv1 (R), Vti1 (Qb), and Vam7 (Qc) mediate membrane fusion  
370 in endo-lysosomal trafficking (Wickner, 2010). Like other SNARE complexes (Zorman et al.,  
371 2014), the GLUT4 and vacuolar SNARE complexes disassembled stepwise via one or more  
372 partially-zipped intermediates (Figure 8A). In the absence of SM proteins, spontaneous  
373 SNARE assembly was inefficient, with a probability per relaxation of 0.02 for GLUT4 SNAREs  
374 (60 nM SNAP-23) and of 0.04 for vacuolar SNAREs (1  $\mu$ M Vti1 and 1  $\mu$ M Vam7) (Figure 8-  
375 figure supplement 1). In the presence of 2  $\mu$ M Munc18-3 or 0.4  $\mu$ M Vps33, the probability of  
376 SNARE assembly increased to 0.44 for Munc18-3 and to 0.65 for Vps33 (Figure 8A, #1-5).  
377 Thus, both SM proteins strongly enhance the rate of SNARE assembly. All of the more than 50  
378 Munc18-3-mediated SNARE assembly events we observed in our experiments were mediated by  
379 the corresponding template complexes (blue ovals in Figure 8A, #1-3; Figure 8B, a-c). The  
380 Munc18-3 template complex displayed a stability ( $4.3 \pm 0.2$  k<sub>B</sub>T) and an extension relative to the  
381 unfolded state similar to those of the Munc18-1 template complex. In addition, the Munc18-3  
382 template complex depended on the NRD of syntaxin 4, as NRD truncation reduced the  
383 probability of observing the template complex transition to 0.03 (Figure 8B, d). Thus, Munc18-3  
384 and Munc18-1 are quantitatively similar in their ability to chaperone cognate SNARE complex

385 assembly. Importantly, neither Munc18-1 nor Munc18-3 could catalyze the assembly of the  
386 other's cognate SNAREs (Figure 8B, e).

387 We also observed a Vps33-mediated template complex in the absence of Qb- and Qc-  
388 SNAREs (blue ovals in Figure 8A, #6-7; Figure 8C, f). Relaxing the Qa-R-SNARE conjugate in  
389 the presence of both Vps33 and the Qb-SNARE increased the extension change associated with  
390 the template complex transition from 4-6 nm to 7-9 nm (Figure 8C, compare trace g to trace f),  
391 indicating that the Qb-SNARE induced further folding of the templated SNAREs. Relaxing the  
392 Qa-R-SNARE conjugate in the presence of both the Qb- and Qc-SNAREs triggered assembly of  
393 the full SNARE complex from the template complex (Figure 8A, #4-5; Figure 8-figure  
394 supplement 2,3). Taken together, these results indicate that Munc18-3 and Vps33 catalyze  
395 SNARE assembly by templating SNARE folding and association in a manner analogous to that  
396 observed for Munc18-1, in strong support of a conserved templating mechanism underlying SM  
397 protein function.

398

## 399 **Discussion**

400 Using geometrically faithful single-molecule experiments, we have mapped out a new pathway  
401 for the assembly of neuronal SNARE complexes. As suggested previously (Baker et al., 2015;  
402 Sitarska et al., 2017), the key intermediate is a template complex in which the SM protein  
403 Munc18-1 serves as the template to arrange the Qa-SNARE syntaxin and the R-SNARE VAMP2  
404 in a Y-shaped conformation with aligned NTDs and splayed CTDs. Although the first 3-4 layers  
405 of the NTDs are not expected to interact directly with the template, they nonetheless appear to be  
406 properly zippered in the template complex. Our experiments further indicate that the Qbc-  
407 SNARE SNAP-25 binds rapidly to the template complex, presumably by recognizing the

408 properly aligned NTDs of the Qa- and R-SNAREs. SNAP-25 binding is occasionally  
409 accompanied by a modest amount of further zippering to form a partially-zippered state  
410 stabilized by Munc18-1. Finally, full zippering happens in a single, apparently cooperative  
411 transition, in most cases accompanied by Munc18-1 release. Like most enzymatic intermediate  
412 states, the template complex is relatively unstable (see Materials and Methods for further  
413 analysis), preventing it from functioning as a kinetic trap. Nevertheless, our experiments show  
414 that it is an obligatory and productive intermediate, which promotes both the speed and the  
415 accuracy of SNARE assembly. In addition, the extensive SM-SNARE interactions within the  
416 template complex presumably help to prevent the formation of non-cognate SNARE complexes.

417 Our data appear to be inconsistent with an alternative model in which Munc18-1 binds to and  
418 activates the t-SNARE complex to promote t-v zippering (Dawidowski and Cafiso, 2016;  
419 Jakhanwal et al., 2017) (Figure 1, upper pathway). We found that Munc18-1 inhibited t-SNARE  
420 complex formation and minimally affected t-v zippering, consistent with previous reports (Ma et  
421 al., 2013; Pobbati et al., 2006; Zhang et al., 2015). Shen et al. found that fusion between t-  
422 liposomes (containing syntaxin:SNAP-25 complexes) and v-liposomes (containing VAMP2) was  
423 only stimulated by Munc18-1 after all three were preincubated at 4°C for 3 hours (Shen et al.,  
424 2007). This preincubation, under conditions that prevent fusion, was presumably needed to allow  
425 formation of the Munc18-1-stabilized partially-zippered SNARE complexes we observe (Figure  
426 1, state v). Preincubating Munc18-1 with t-liposomes alone resulted in little stimulation,  
427 inconsistent with the formation of an activated Munc18-1:t-SNARE complex. Finally, t-SNARE  
428 complexes, because they are vulnerable to the ubiquitous SNARE disassembly machinery  
429 NSF/SNAP (Lai et al., 2017), do not appear to represent plausible intermediates in physiological  
430 SNARE assembly pathways.

431 Our results identify a new role for the NRD of syntaxin: stabilizing the template complex.  
432 The stabilizing effect of the NRD is partitioned between its N-peptide and its H<sub>abc</sub> domain  
433 (Figure 2A,B; Figure 4). The stabilizing effect of the N-peptide, which binds to a distal site on  
434 Munc18-1 (Burkhardt et al., 2008), is unsurprising, as the N-peptide has long been thought to  
435 promote interactions between Munc18-1 and partially or completely folded SNARE complexes  
436 (Dulubova et al., 2007; Ma et al., 2015; Shen et al., 2007). However, the stabilizing effect of the  
437 H<sub>abc</sub> domain, even when it is added in trans, is unexpected. This role adds to the others that have  
438 been ascribed to the syntaxin NRD and that have complicated efforts to elucidate the  
439 physiological neuronal SNARE assembly pathway (Meijer et al., 2012; Shen et al., 2010; Zhou  
440 et al., 2013). By contrast, the Qa-SNARE Vam3 does not adopt a closed conformation  
441 (Dulubova et al., 2001), a simplifying feature that prompted us to omit its NRD from both our  
442 earlier crystallographic studies (Baker et al., 2015) and from the single-molecule experiments  
443 reported here. Fortunately the Vps33 template complex was observable in the absence of the Qa-  
444 SNARE NRD (Figure 8). Thus, whereas template complexes appear to be a general feature of  
445 SM-mediated SNARE assembly, their stabilization via Qa-SNARE NRDs may represent a more  
446 specialized elaboration.

447 Other factors involved in neurotransmitter release may impinge upon the intermediate states  
448 we have identified. For example, Munc13-1 plays important roles in opening syntaxin and  
449 promoting proper SNARE complex assembly (Lai et al., 2017; Ma et al., 2011; Yang et al.,  
450 2015). The opener function of Munc13-1 was circumvented in our studies by two orthogonal  
451 strategies, each of which precludes full syntaxin closure. Notably, however, fully closed syntaxin  
452 was only marginally more stable than the template complex ( $7.2 \pm 0.2$  k<sub>B</sub>T vs  $5.2 \pm 0.2$  k<sub>B</sub>T;  
453 Figure 2-figure supplement 4). Given that Munc13-1 binds weakly to both syntaxin and VAMP2

454 at sites likely complementary to those involved in Munc18-1 binding (Lai et al., 2017; Sitarska et  
455 al., 2017; Wang et al., 2017), it is attractive to hypothesize that Munc13-1 exerts both its  
456 syntaxin opening and SNARE proofreading activities by binding to and stabilizing the template  
457 complex (Figure 1, from state i to state iv). Additional factors including complexin and  
458 synaptotagmin likely capture the SNARE complex downstream of the template complex, for  
459 example by binding to the partially zippered SNARE complex (state v), thereby imposing further  
460 regulatory constraints – especially calcium triggering – on synaptic vesicle fusion (Brunger et al.,  
461 2018).

462 A striking finding in this study is the concordance between the effect of mutations, including  
463 phosphomimetic mutations, on neurotransmitter release and on the stability of the template  
464 complex (Figure 4; Table 1). This concordance strongly supports the hypothesis that the template  
465 complex is a physiologically relevant intermediate in SNARE assembly. It is perhaps surprising  
466 that many mutations with strong effects on neurotransmitter release have seemingly modest  
467 effects on the stability of the template complex. This is, however, readily explained by the  
468 exponential dependence of the overall SNARE assembly rate on the stability of the rate-limiting  
469 intermediate, by the requirement for multiple SNARE complexes to mediate efficient membrane  
470 fusion (Bao et al., 2018; Mohrmann et al., 2010), and/or by the effects of other factors such as  
471 Munc13-1 on the stability of the template complex.

472 The finding that several SM proteins – Munc18-1, Munc18-3, and Vps33 – all catalyze  
473 SNARE assembly via a template complex confirms that this is a key conserved function of SM  
474 proteins. SNARE zippering, because it involves the coupled folding and assembly of four  
475 intrinsically disordered SNARE motifs, is inefficient (Brunger, 2005; Lai et al., 2017). SM  
476 proteins, by increasing both the rate and fidelity of SNARE assembly, are likely to be key factors

477 for the control of membrane fusion in vivo. Templated assembly may also resist the disassembly  
478 activity of NSF/SNAP.

479 We propose a working model, using neuronal exocytosis as an example, that places our  
480 results in the context of the full fusion machinery (Figure 1). First, SNAREs and SM proteins are  
481 recruited to, and thereby concentrated at, the future site of membrane fusion during vesicle  
482 docking (Figure 1, state i). Munc13-1 helps bridge vesicle and plasma membranes and recruit  
483 SNAREs, and catalyzes opening of the closed syntaxin (state ii) (Lai et al., 2017; Ma et al., 2011;  
484 Ma et al., 2013). Subsequently, Munc18-1 binds to the R-SNARE to form the template complex  
485 (iv), which may be further stabilized by Munc13-1. Binding of SNAP-25 generates a partially-  
486 zippered SNARE complex stabilized by Munc18-1 (state v). Synaptotagmin and complexin  
487 likely associate with the partially-zippered SNARE complex, stabilizing it in a primed trans-  
488 SNARE complex in preparation for calcium-triggered exocytosis (Sudhof and Rothman, 2009).  
489 Finally, calcium triggers fast CTD zippering and Munc18-1 displacement (state vi), inducing  
490 membrane fusion.

491

492

## 493 **Materials and Methods**

494

### 495 **SNARE constructs**

496 The cytoplasmic domains of rat neuronal SNAREs, and the SNARE motifs of *C. thermophilum*  
497 vacuolar SNAREs, were used. Their sequences are listed below and their domains and  
498 crosslinking sites are shown in Figure 2-figure supplement 1. In the sequences below, numbers in

499 parenthesis after each construct name indicate the amino acid numbering in the original protein  
500 sequence if there is any truncation, followed by the mutated amino acids, if any, which are also  
501 colored red in the sequence. The amino acids in the zero layer are colored cyan. Extra sequences,  
502 including linker sequences, are underlined, with Avi-tags or cysteine residues used for  
503 crosslinking shown in bold.

504

505 VAMP2 (1-96, N29C):

506 MSATAATVPPAAPAGEGGPPAPPPNLTS**CRRL**QQTQAQVDEVVDIMRVNVDKVLE**RDQ**

507 KLSELDDRADALQAGASQFETSAAKLKRKYWWKNLKMMGGSGNGSGGLCTPSRGGD

508 YKDDDDK

509

510 Syntaxin-1A (1-265, R198C, C145S):

511 MKDRTQELRTAKDSDDDDDDVTVTVD~~DR~~RFMDEFFEQVEEIRGFIDKIAENVEEVK**RKHS**

512 AILASPNPDEKTKEELEELMSDIKKTANKVRSK**LKS**SIEQSIEQEEGLNRSSADLRIRKTQH

513 STLSRKFVEVMSEYNATQSDYRER**SKGRI**QRQLEITGR**TTT**SEELED**MLES**GNPAIFASGI

514 IMDSSISKQALSEIET**CH**SEI**IK**LENSIRELHDMFMDMAMLVES**Q**GEMIDRIEYNVEHA**VD**

515 YVERAVSDTKKAVKYQSKARR**KKGGSGNGGSGSGLNDIFEAQKIEWHE**

516

517 Syntaxin-1A (1-265, I187C, C145S):

518 MKDRTQELRTAKDSDDDDDDVTVTVD~~DR~~RFMDEFFEQVEEIRGFIDKIAENVEEVK**RKHS**

519 AILASPNPDEKTKEELEELMSDIKKTANKVRSK**LKS**SIEQSIEQEEGLNRSSADLRIRKTQH

520 STLSRKFVEVMSEYNATQSDYRER**SKGRI**QRQLEITGR**TTT**SEELED**MLES**GNPAIFASGI

521 IMDSSCSKQALSEIETRHSEIIKLENSIRELHDMFMDMAMLVESQGEMIDRIEYNVEHAV

522 DYVERAVSDTKKAVKYQSKARRKKGGSGNGGSGSGLNDIFEAQKIEWHE

523

524 Syntaxin-1A,  $\Delta$ NRD (187-265, R198C):

525 ISKQALSEIETCHSEIIKLENSIRELHDMFMDMAMLVESQGEMIDRIEYNVEHAVDYVER

526 AVSDTKKAVKYQSKARRKKGGSGNGGSGSGLNDIFEAQKIEWHE

527

528 Syntaxin-1A,  $\Delta$ H<sub>abc</sub> ( $\Delta$ 27-146, R198C)

529 MKDRTQELRTAKDSDDDDVTVTVDRITSGRIQRQLEITGRITTTSEELEDMLESGNPAIF

530 ASGIIMDSSISKQALSEIETCHSEIIKLENSIRELHDMFMDMAMLVESQGEMIDRIEYNVE

531 HAVDYVERAVSDTKKAVKYQSKARRKKGGSGNGGSGSGLNDIFEAQKIEWHE

532

533 SNAP-25B (C85S, C88S, C90S, C92S):

534 MAEDADMRNELEEMQRRADQLADESLESTRMLQLVEESKDAGIRTLVMLDEQGEQL

535 ERIEEMDQINKDMKEAEKNLTDLGKFSGLSVSPSNKLKSSDAYKKA WGNNQDGVVAS

536 QPARVVDEREQMAISGGFIRRVTNDARENEMDENLEQVSGIIGNLRHMALDMGNEIDT

537 QNRQIDRIMEKADSNKTRIDEANQRATKMLGSG

538

539 Syntaxin-4 (1-273, Q194C)

540 MRDRTHELRQGDNISDDEDEVVALVVHSGAARLSSPDDEFFQKVQTIRQTMAKLESK

541 VRELEKQQVTILATPLPEESMKQGLQNLREEIKQLGREVRAQLKAIEPQKEEADENYNS

542 VNTRMKKTQHGVLSQQFVELINKSNSMQSEYREKNVERIRRQLKITNAGMVSDEELEQ

543 MLDSGQSEVFSNILKDTCVTRQALNEISARHSEIQQLERSIRELHEIFTFLATEVEMQGE



544 MINRIEKNILSSADYVERGQEHVKIALENQKKARKKKGGSGNGGSGSGLNDIFEAQKIE

545 WHE

546

547 Syntaxin-4, ΔNRD (191-273, R206C)

548 GKDTQVTRQALNEISA**CH**SEIQQLERSIRELHEIFTFLATEVEM**Q**GEMINRIEKNILSSAD

549 YVERGQEHVKIALENQKKARKKKGGSGNGGSGSGLNDIFEAQKIEWHE

550

551 SNAP-23 (C79S, C80S, C83S, C85S, C87S)

552 MDDLSP EEIQLRAHQVTDESLESTRILGLAIESQDAGIKTITMLDEQGEQLNRIEEGMDQ

553 INKDMREAEKTLTELNK**SSGLSVSP**NRRTKNFESGKNYKATWGDGGDSSPSNVVSKQPS

554 RITNGQPQTTGAASGGYIKRITNDAREDEMEENLTQVGSILGNLKNMALDMGNEIDAQ

555 NQIQKITEKADTNKNRIDIANTRAKKLIDS

556

557 Nyv1 (148-218):

558 GSSCGGGVENNGGDSINSVQREIEDVRGIMSRNIEGLLE**R**GERIDLLVDKTDRLGGSARE

559 FRLRSRGLKRKMWWKNVKGGSGNGSGGGCKAAA

560

561 Vam3 (181-252):

562 GSSCGGGLILEREEEIRNIEQGVSDLNVLFFQQAQLVAE**Q**GEVLDTIERNVEAVGDDTRG

563 ADRELRAAARYQKRARSRMGGSGNGSGLKNSGGSGSGGNRGGSDSGGSGGLNDIFEA

564 OKIEWHEAAA

565

566 Vti1 (126-190)

567 GSMLDRSTQRLKASQALAAETEAIGASMLAQLQQREVIANTTRILYESEGYVDRSIKSL

568 KGIARRM

569

570 Vam7 (308-371)

571 GSQKLDEQEEYVKDIGVHVRRLRHLGTEIYNAIEQSKDDLDTLDQGLTRLGNGLDKAK

572 ALEKKVSGR

573

#### 574 **DNA handle preparation**

575 The DNA handle used in our single-molecule experiments is 2,260 bp in length and contains a  
576 thiol group (-SH) at one end and two digoxigenin moieties at the other end. The DNA handle  
577 was generated by PCR and purified using a PCR purification kit (Qiagen). Both labels were  
578 added to the 5' ends of the PCR primers during synthesis.

579

#### 580 **Protein purification**

581 The coding sequences for rat or human syntaxin-1A, VAMP2, Munc18-1, and syntaxin-4 were  
582 cloned into pET-SUMO (Invitrogen), which introduced a His<sub>6</sub>-SUMO tag at the N-termini of the  
583 proteins. The coding sequences for rat SNAP-25B and SNAP-23 were cloned into pET-15b  
584 (Novagen), which introduced a His<sub>6</sub> tag at the N-terminus of the protein. The coding sequence  
585 for rat Munc18-3 was cloned into pET-15a (Novagen) and codon-optimized for protein  
586 expression in bacteria (Morey et al., 2017). The plasmids were transformed into *Escherichia coli*  
587 BL21 (DE3) cells (Agilent Technologies), which were then grown in LB media supplemented  
588 with the appropriate antibiotics at 37°C until the OD at 600 nm reached 0.6-0.8. The cells were

589 induced with 1 mM IPTG at 37°C for 5 h. Variants of syntaxin-1A, VAMP2, SNAP-25B and  
590 Munc18-1 were prepared using standard PCR-based site-directed mutagenesis (Qiagen).

591 The neuronal SNARE proteins and Munc18-1 were purified using His-tag affinity  
592 purification, as previously described (Gao et al., 2012; Ma et al., 2015). Briefly, the cells were  
593 disrupted in HEPES buffer (25 mM HEPES, 400 mM KCl, 10% glycerol, 0.5 mM TCEP, pH  
594 7.7) containing 10 mM imidazole and one tablet of EDTA free protease inhibitor cocktail  
595 (cOmplete™, Roche). Cell lysates were cleared by ultracentrifugation. The resulting supernatant  
596 was mixed with Ni-NTA resin overnight, after which the resin was washed successively with  
597 HEPES buffer containing 20, 40, and 60 mM imidazole. SNAP-25B, VAMP2 and Munc18-1  
598 were eluted in HEPES buffer containing 300 mM imidazole. Syntaxin-1A was eluted in  
599 biotinylation buffer (25 mM HEPES, 200 mM potassium glutamate, 300 mM imidazole, pH 7.7)  
600 for future biotinylation (see below). For VAMP2 and Munc18-1, the His<sub>6</sub>-SUMO tags were  
601 cleaved by SUMO proteases at 4°C overnight. The cleaved tags were removed by binding to Ni-  
602 NTA resin followed by centrifugation.

603 The *Chaetomium thermophilum* vacuolar SNARE motifs and Vps33 were purified using a  
604 previously described protocol with minor modifications (Baker et al., 2015). The *C.*  
605 *thermophilum* SNARE motifs were cloned into a modified pQLinkH vector, resulting in an N-  
606 terminal His<sub>7</sub>-MBP-tag. The plasmids were transformed into *E. coli* C43 (DE3) cells (Lucigen),  
607 which were grown in LB media supplemented with ampicillin at 37°C until the OD at 600 nm  
608 reached ~0.6. The cells were induced with 0.5 mM IPTG at 30°C for 4 h and disrupted in lysis  
609 buffer (20 mM HEPES, pH 8.0, 350 mM NaCl, 10 mM β-mercaptoethanol and 1 mM PMSF)  
610 supplemented with 40 mM imidazole. The lysate was cleared by centrifugation at 17,000 g for  
611 30 min. The His<sub>7</sub>-MBP-tagged SNARE domains and His<sub>7</sub>-tagged Vps33 were purified by

612 binding to Ni-NTA resin for several hours, followed by three washes with lysis buffer  
613 supplemented with 40 mM imidazole, and elution in lysis buffer supplemented with 300 mM  
614 imidazole. For Vps33, the protein was concentrated, followed by size exclusion chromatography  
615 on a S200 column equilibrated with gel filtration buffer (20 mM Tris pH 8.0, 250 mM NaCl, 5%  
616 glycerol and 0.5 mM TCEP). For the SNARE domains, the His<sub>7</sub>-MBP tag was removed by  
617 incubation with TEV protease with a protein:protease ratio of 20:1 for 3 h at room temperature.  
618 The sample was pre-cleared by running on a gravity flow amylose column and concentrated,  
619 followed by size exclusion chromatography on a S75 column equilibrated with gel filtration  
620 buffer. Residual His<sub>7</sub>-MBP was removed using a gravity flow amylose column.

621 After purification, Qa-SNAREs (syntaxin-1A and Vam3) were biotinylated at the Avi-tag in  
622 the presence of 50 µg/mL BirA, 50 mM bicine buffer, pH 8.3, 10 mM ATP, 10 mM magnesium  
623 acetate, and 50 µM d-biotin (Avidity) at 4 °C overnight (Gao et al., 2012; Jiao et al., 2017).

624

### 625 **SNARE complex formation**

626 To form synaptic SNARE complexes, syntaxin-1A, SNAP-25B, and VAMP2 were mixed in a  
627 molar ratio of 0.8:1:1.2 and incubated at 4°C overnight in the HEPES buffer (pH 7.7) with 2 mM  
628 TCEP. The SNARE complexes were purified using the His-tag on SNAP-25B (Gao et al., 2012).  
629 The quality of the purified neuronal SNARE complex was confirmed by its SDS-resistance in  
630 denaturing gel electrophoresis. To form *C. thermophilum* vacuolar SNARE complexes, the His-  
631 MBP-tagged Nyv1, Vam3, Vti1 and Vam7, 250 nmol each, were mixed and incubated overnight  
632 at 4°C. The complexes were separated from unbound SNAREs by size exclusion  
633 chromatography. The His-MBP-tags were cleaved from the SNARE domains using TEV

634 protease and removed by binding to amylose resin. The vacuolar SNARE complex was stored in  
635 20 mM Tris, pH 8.0, 250 mM NaCl, 5% glycerol, 0.5 mM TCEP.

636

### 637 **Crosslinking**

638 We crosslinked the R and Qa-SNAREs at the N-termini of their SNARE motifs and the R-  
639 SNARE C-terminus and the 2,260 bp-DNA handle after the SNARE complexes were formed. To  
640 this end, both SNARE complexes and DNA handles were treated with 2 mM TCEP for 1 h at  
641 room temperature, after which Bio-Spin 6 columns (Bio-Rad) were used to change the buffer to  
642 crosslinking buffer A (100 mM phosphate buffer, 500 mM NaCl, pH 5.8) for DNA handles or  
643 crosslinking buffer B (100 mM phosphate buffer, 500 mM NaCl, pH 8.5) for SNARE  
644 complexes. Next, DNA handles were incubated with 1 mM 2,2'-dithiodipyridine disulfide  
645 (DTDP) for 1 h at room temperature to activate the thiol group for the following crosslinking  
646 reaction. After incubation, the DNA handle was purified using a PCR purification kit and eluted  
647 in crosslinking buffer B to remove excess DTDP. Finally, the SNARE complexes were mixed  
648 with the DTDP-treated DNA handles in a 50:1 molar ratio in crosslinking buffer B and incubated  
649 at room temperature overnight, as previously described (Gao et al., 2012).

650

### 651 **Single-molecule manipulation experiments**

652 All pulling experiments were performed using dual-trap high-resolution optical tweezers as  
653 previously described (Gao et al., 2012; Ma et al., 2015). Briefly, an aliquot of the crosslinked  
654 protein-DNA mixture containing 10-100 ng DNA was mixed with 10  $\mu$ L 2.1  $\mu$ m diameter anti-  
655 digoxigenin antibody coated polystyrene beads (Spherotech) and incubated at room temperature

656 for 15 min. Then the anti-digoxigenin coated beads and 2  $\mu$ L 1.7  $\mu$ m diameter streptavidin-  
657 coated beads (Spherotech) were diluted in 1 mL PBS buffer (137 mM NaCl, 2.7 mM KCl, 8.1  
658 mM Na<sub>2</sub>HPO<sub>4</sub>, 1.8 mM KH<sub>2</sub>PO<sub>4</sub>, pH 7.4). Subsequently, the bead solutions were separately  
659 injected into the top and bottom channels of a homemade microfluidic chamber as described  
660 below. The central channel contained PBS buffer with an oxygen scavenging system comprising  
661 400 mg/mL glucose (Sigma-Aldrich), 0.02 unit/mL glucose oxidase (Sigma-Aldrich), and 0.06  
662 unit/mL catalase (Sigma-Aldrich). A single anti-digoxigenin-coated bead was trapped and  
663 brought close to a single streptavidin-coated bead held in another optical trap to form a single  
664 SNARE-DNA tether between the two beads.

665 A single SNARE protein (Qa), SNARE conjugate (Qa-R), SNARE complex, or SNARE/SM  
666 complex (collectively called the protein complex below) was pulled or relaxed by moving one of  
667 the optical traps at a speed of 10 nm/s. In a typical single-molecule manipulation experiment, a  
668 single protein complex was first pulled to a high force to completely disassemble the complex,  
669 yielding information on the stability and structure of the complex. Then the complex was relaxed  
670 to observe its possible refolding or re-assembly. To better observe the assembly of the template  
671 complex or the SNARE complex, during relaxation the protein complex was often held at  
672 constant trap separations in a force range of 2-8 pN for various times. The formation probability  
673 of the complex generally increased as the waiting time increased. Therefore, the formation  
674 probability of the template complex or the SNARE four-helix bundle reported in the main text,  
675 including Table 1, was determined with a maximum waiting time of one min if no folding was  
676 observed.

677

## 678 **Dual-trap high-resolution optical tweezers**

679 The optical tweezers used in our experiments are home-built and described in detail elsewhere  
680 (Gao et al., 2012; Ma et al., 2015). Briefly, the tweezers are assembled on an optical table  
681 located in an acoustically isolated, temperature- and air-flow-controlled room. A 1064 nm laser  
682 beam from a 4 W Nd:YVO<sub>4</sub> diode pumped solid state laser (Spectr-Physics, CA) is expanded by  
683 a telescope by about 5 fold, and split by a polarizing beam splitter (PBS) into two orthogonally  
684 polarized laser beams. The two beams are reflected by two mirrors and combined by another  
685 PBS. One of the mirrors is mounted on a nano-positioning stage that can tip/tilt in two axes with  
686 high resolution (Mad City Labs, WI). The combined beams are further expanded by about two  
687 fold and collimated by another telescope, and focused by a water immersion 60X objective with  
688 a numerical aperture of 1.2 (Olympus, PA), forming two optical traps in a central channel of the  
689 microfluidic chamber. One of the optical traps can be moved in the sample plane with sub-  
690 angstrom resolution via the nano-positioning stage. The flow cell is formed between two  
691 coverslips sandwiched by Parafilm cut into three parallel channels. The top and bottom channels  
692 are connected to the central channel by glass tubing. The outgoing laser beams are collected and  
693 collimated by an identical objective, split again by a PBS, and projected onto two position-  
694 sensitive detectors (Pacific Silicon Sensor, CA), which detect displacements of the two beads in  
695 optical traps through back-focal-plane interferometry. The optical tweezers are calibrated before  
696 each single-molecule experiment by measuring the Brownian motion of the trapped beads, which  
697 yields the power-spectrum density distributions of bead displacements. The force constants of  
698 optical traps are determined by fitting the measured power-spectrum density distributions with a  
699 Lorentzian function.

700

## 701 **Circular dichroism (CD) spectra of Munc18-1**

702 CD spectra of WT and mutant Munc18-1 proteins were measured in 20 mM phosphate buffer using  
703 an Applied Photophysics Chirascan equipped with a 2 mm quartz cell. The readings were made at 1  
704 nm intervals, and each data point represents an average of 6 scans at a speed of 120 nm/min over the  
705 wavelength range of 190 to 250 nm.

706

## 707 **Derivations of protein unfolding energy and folding and unfolding rates from force-** 708 **dependent measurements**

709 Our methods of data analysis and the relevant Matlab codes are described in detail elsewhere  
710 (Gao et al., 2012; Rebane et al., 2016). Briefly, the extension-time trajectories obtained at  
711 constant trap separations or mean forces were first analyzed by two-state hidden-Markov  
712 modeling (McKinney et al., 2006; Zhang et al., 2016b), which revealed the idealized state  
713 transitions, extension changes, unfolding probabilities, and folding and unfolding rates. These  
714 measurements were used to derive the folding intermediates and their associated energy and  
715 kinetics.

716 We quantified the structural change of a single protein based on the measured force and  
717 extensions. The control parameter of our pulling experiment is the separation between two  
718 optical traps ( $D$ ). Given the trap separation, the extension ( $X$ ) and tension ( $F$ ) of the protein-  
719 DNA tether are calculated as

$$720 \quad X = D - x_1 - x_2 \quad (1)$$

721 and



722 
$$F = (F_1 + F_2)/2, \quad (2)$$

723 respectively, where  $x_1$  and  $x_2$  are displacements of the two beads in optical traps, and  $F_1$  and  $F_2$   
724 are the corresponding forces applied to the beads. Both bead displacement  $\mathcal{X}$  and the force  $F$  are  
725 derived from voltage outputs of the position-sensitive detectors after proper calibrations. In Eq.  
726 (1), we have defined a default relative trap separation by neglecting the contribution of constant  
727 bead diameters. It is this relative trap separation that is shown in Figure 2-figure supplement 2.  
728 As a protein molecule unfolds, its extension ( $x_m$ ) increases, which leads to retraction of both  
729 beads in their optical traps and the accompanying decrease in tension (Figure 2-figure  
730 supplement 2). Thus, during protein folding and unfolding transitions, the tether tension changes  
731 in an out-of-phase manner with respect to the tether extension, and thus is state-dependent. In the  
732 constant trap separation, the mean force is defined as the mean of the average forces associated  
733 with the folded and unfolded states (Rebane et al., 2016).

734 We modeled the unfolded peptide and the DNA handle by a worm-like chain model. Based  
735 on this model, the stretching force  $F$  and the entropic energy  $E$  of a semi-flexible polymer  
736 chain are related to its extension  $\mathcal{X}$ , contour length  $L$ , and persistence length  $P$  by the follow  
737 formulae

738 
$$F = \frac{k_B T}{P} \left[ \frac{1}{4 \left(1 - \frac{x}{L}\right)^2} + \frac{x}{L} - \frac{1}{4} \right] \quad (3)$$

739 and

740 
$$E = \frac{k_B T}{P} \frac{L}{4 \left(1 - \frac{x}{L}\right)} \left[ 3 \left(\frac{x}{L}\right)^2 - 2 \left(\frac{x}{L}\right)^3 \right], \quad (4)$$

741 respectively. We adopted a persistence length 40 nm for DNA and 0.6 nm for the unfolded  
742 polypeptide (Gao et al., 2012; Ma et al., 2015; Rebane et al., 2016). Because the DNA extension  
743 ( $x_{DNA}$ ) is known given a force or trap separation via Eq. (3), the extension of the protein can be  
744 calculated as  $x_m = X - x_{DNA}$ . The protein extension generally comprises the extensions of the  
745 unfolded polypeptide portion ( $x_p$ ) and the folded portion ( $H$ ) of the protein if any, or  
746  $x_m = x_p + H$ . The former can be again calculated by Eq. (3), given the contour length of the  
747 unfolded polypeptide ( $L_p$ ), whereas the latter can be treated as a force-independent constant, or a  
748 hard core of the protein (Rebane et al., 2016). Here the size of the hard core is determined from  
749 the two pulling sites on the folded protein portion, which changes with the protein state. Thus,  
750 the contour length of the unfolded polypeptide and the size of the folded protein portion are  
751 correlated and can be determined based on a structural model for protein transitions. To derive  
752 the structure of the template complex, we assumed a hard core size of 3 nm for the folded  
753 template complex, as determined from the structure-based model (Baker et al., 2015).  
754 Consequently, we could determine the contour length of the polypeptide chain in the Qa-R  
755 conjugate that is either free or bound by Munc18-1. The number of amino acids in a polypeptide  
756 is its contour length divided by the contour length per amino acid, which is chosen to be 0.365  
757 nm (Gao et al., 2012; Rebane et al., 2016). The number of amino acids in the completely  
758 unfolded SNARE state 5 is known (Figure 2-figure supplement 1), which helps derive the  
759 structure of the template complex based on the extension change during the template complex  
760 transition. We determined that 87 ( $\pm 2$ , S.D.) amino acids are sequestered in the folded template

761 complex, including the N-terminal loop formed between syntaxin-1 and VAMP2 due to  
762 crosslinking. Based on our construct design (Figure 2-figure supplement 1), this length is  
763 consistent with the structure of the predicted template complex (Figure 1A).

764 Similarly, we modeled the total free energy of the whole dumb-bell system in optical traps,  
765 or

$$766 \quad G = \frac{F^2}{2k_{traps}} + E_{DNA} + E_p + V, \quad (5)$$

767 where the first term represents the potential energy of the two beads in optical traps with  
768  $k_{traps} = k_1 k_2 / (k_1 + k_2)$  the effective force constant of the two traps, the second and third terms are  
769 entropic energies of the DNA handle and the unfolded polypeptide, respectively, calculated by  
770 Eq. (4), and the last term is the free energy of the protein at zero force. Based on the Boltzmann  
771 distribution, the protein unfolding energy  $\Delta V$  can be determined by fitting the measured  
772 unfolding probability using Eq. (5). Equation (5) can be similarly applied to the transition state  
773 of protein folding (Rebane et al., 2016). With Kramers' rate equation, the folding and unfolding  
774 rates are calculated. By fitting the calculated rates to the measured rates, we derive the energy  
775 and conformation of the transition state, which also yield the folding and unfolding rates at zero  
776 force. Complete data sets from individual molecules are separately fit and the unfolding energies  
777 and transition rates, typically averaged over more than three different molecules, are reported  
778 (Table 1). The average folding rates and unfolding rates of the WT and mutant template  
779 complexes fall in the ranges of 17-568 s<sup>-1</sup> and 0.1-10 s<sup>-1</sup>, respectively, with a standard error  
780 typically close to the corresponding average rate for each template complex.

781

## 782 **Estimation of the affinity between VAMP2 and Munc18-bound syntaxin**

783 The N-terminal crosslinking between Qa- and R-SNAREs used in our assay is crucial for us to  
784 observe and characterize the template complex. The crosslinking destabilizes the closed  
785 syntaxin, thereby bypassing the requirement for Munc13-1, mitigates SNARE misassembly, for  
786 example, formation of various anti-parallel SNARE bundles (Lai et al., 2017), and avoids  
787 nonspecific VAMP2-Munc18-1 interactions (Sitarska et al., 2017). Therefore, the crosslinking  
788 simplifies our experimental design and data interpretation. Three lines of evidence suggest that  
789 the crosslinking does not compromise the major conclusions derived from our assay. First, the  
790 stability of the template complex does not depend upon the crosslinking site used in our assay (at  
791 R198C or I187C, Figure 2-figure supplement 1). This observation suggests that the crosslinking  
792 does not alter the structure of the template complex and is likely located at a disordered region.  
793 Second, the derived template model recapitulates many distinct features of the fusion machinery,  
794 including its dependence upon NRD, phosphorylation, and various mutations. Finally, the  
795 crosslinking increases the local SNARE concentration around Munc18-1, which mimics the  
796 environment of SNARE assembly and membrane fusion in vivo due to vesicle tethering and  
797 SNARE recruitment. For example, Munc13-1 essentially crosslinks both syntaxin and VAMP2  
798 by simultaneously binding the two (Figure 1).

799 The effective concentration due to the crosslinking can be quantified, which is used to  
800 estimate the binding affinity between VAMP2 and partially-closed syntaxin in the absence of  
801 crosslinking (Zhang et al., 2016a). To derive the local concentration of the crosslinked VAMP2  
802 (at R198C) around the partially-closed syntaxin, we made three assumptions: 1) the partially-  
803 closed syntaxin has a conformation similar to the conformation seen in the crystal structure of  
804 the Vps33:Vam3 complex (Baker et al., 2015); 2) VAMP2 binding kinetics is dominated by

805 insertion of Phe 77 into the F-binding pocket on the Munc18-1 surface, as is supported by our  
806 data; and 3) the unfolded SNARE polypeptides are described by a Gaussian chain model. Thus,  
807 VAMP2 binding to the partially closed syntaxin can be modeled by Phe 77 binding to the F-  
808 binding pocket while Phe 77 is tethered to the -7 layer of Vam3 (i.e., the N-terminus of the main  
809 Vam3 helix in the Vps33:Vam3 structure, PDB code 5BUZ) via a polypeptide linker. The length  
810 of the linker is 54 amino acids based on our Qa-R SNARE conjugate, or  $L=19.7$  nm in terms of  
811 the contour length. The distance between the F-binding pocket and the tethering point ( $R$ ) is  
812 measured to be 6.34 nm. Therefore, the effective concentration  $c$  of the tethered Phe 77 around  
813 its binding pocket is calculated as  $c=3.7\times 10^{-4}$  M, using the following formula

$$814 \quad c = \frac{1}{N_A} \left( \frac{3}{4\pi PL} \right)^{\frac{3}{2}} \exp\left( -\frac{3R^2}{4PL} \right), \quad (6)$$

815 where  $N_A$  is Avogadro's number and  $P=0.6$  nm is the persistence length of the polypeptide. Due  
816 to coupled binding and folding, the folding and unfolding rates of the template complex we  
817 measure should be equal to the binding and dissociation rates estimated here. Therefore, the  
818 folding rate  $k_f=k_{on}\times c$ , where  $k_{on}$  is the bimolecular rate constant for VAMP2 binding to the  
819 partially-closed syntaxin. Using our measured folding and unfolding rates, we calculated the  
820 VAMP2 binding rate constant as  $k_{on}= 3.5\times 10^5$  s<sup>-1</sup>M<sup>-1</sup>, energy as 13.1 k<sub>B</sub>T, or a VAMP2  
821 dissociation constant as 2 μM. Supposing that VAMP2 binding to the fully closed syntaxin  
822 requires an energy gain of 4.6 k<sub>B</sub>T compared to the partially closed syntaxin (corresponding to  
823 the energy difference between the two syntaxin states), the VAMP2 binding affinity to the fully  
824 closed syntaxin is estimated to be 200 μM.

825

826 **Data and software availability**

827 For custom programs and scripts used in this study, please contact Dr. Yongli Zhang  
828 ([yongli.zhang@yale.edu](mailto:yongli.zhang@yale.edu)).

829

830 **Acknowledgements**

831 We thank J. Rothman and A. Horwich for discussion, G. Shimamura for technical assistance, and  
832 D. Fasshauer for providing the plasmid for Munc18-3 purification. This work was supported by  
833 NIH grants R01GM093341 and R01GM120193 to Y.Z., T32GM007223 to J.J., and  
834 R01GM071574 to F.M.H., and by the German Research Foundation (DFG) grant PO2195/1-1 to  
835 S.A.P.

836

837 **Competing financial interests**

838 The authors declare no competing financial interests.

839

840 **Author contributions**

841 Conceptualization, J.J., M.H., S.A.P., R.W.B., F.M.H., and Y. Z.; Investigation, J.J., M.H.,  
842 S.A.P., R.W.B., Y.X., H.Q., Y.X., Y.W., H.J.; Writing, J.J., M.H., S.A.P., F.M.H., and Y. Z.;  
843 Software, J.J. and Y.Z.; Formal analysis, J.J., M.H., and Y.Z.; Visualization, J.J., M.H., T.J.E.,  
844 F.M.H., and Y.Z.; Funding Acquisition, S.A.P., F.M.H., and Y.Z.; Supervision, F.M.H., and  
845 Y.Z.

846

847

848 **Figure legends**

849

850 **Figure 1. Two potential pathways for Munc18-1-regulated neuronal SNARE assembly**

851 (i) Munc18-1 first serves as a syntaxin chaperone and binds syntaxin to inhibit its association  
852 with other SNAREs. (ii) Closed syntaxin is opened by Munc13-1, a large multifunctional protein  
853 that also helps tether vesicles to the plasma membrane and binds, albeit with low affinity, both  
854 syntaxin and VAMP2. (iii) Open syntaxin may bind SNAP-25 to form a syntaxin:SNAP-25 or a  
855 Munc18-1:syntaxin:SNAP-25 complex. (iv) Alternatively, open syntaxin may bind VAMP2 to  
856 form a Munc18-1:syntaxin:VAMP2 template complex, as proposed here. Both complexes, (iii)  
857 and (iv), have been proposed to be ‘activated’ for SNARE assembly. (v) and (vi) Other factors  
858 such as synaptotagmin (not shown) target the half-zipped SNARE complex to enable calcium-  
859 triggered further SNARE zippering and vesicle fusion.

860

861 **Figure 2. Single-molecule manipulation based on optical tweezers revealed a ternary**  
862 **template complex**

863 (A) Experimental setup and structural model of the template complex. Some key mutations  
864 tested in this study are indicated by dots: red (phosphomimetic mutations) or gray (others) for  
865 Munc18-1, green for syntaxin, and orange for VAMP2. The helical hairpin of Munc18-1 domain  
866 3a is highlighted in yellow. The NRD of syntaxin comprises an N-peptide (a.a. 1-26, see B), a  
867 three-helical H<sub>abc</sub> domain (27-146, deep salmon), and a linker region (147-199, brown). The  
868 structural model of the template complex is derived from a similar model of Vps33:Vam3:Nyv1  
869 (Baker et al., 2015) by extending the N-terminal helix of the R-SNARE to -7 layer, as justified

870 herein. The NRD stabilizes the template complex, but its positioning in this model is arbitrary.

871 See also Figure 2-figure supplement 1.

872 (B) Crystal structure of closed syntaxin bound to Munc18-1 (PDB ID 3C98) (Misura et al.,  
873 2000). Highlighted are crosslinking sites (I187, R198, and L205), sites of mutations used to  
874 destabilize closed syntaxin (E76K, L165A, and E166A, green dots), and sites of phosphomimetic  
875 mutations (red dots).

876 (C) Force-extension curves (FECs) obtained in the absence (#1) or presence (other FECs) of  
877 Munc18-1 in solution. Throughout the figures, all FECs are color coded in the same fashion:  
878 gray for pulling the initial purified SNARE complex, blue for subsequent pulls, black for  
879 relaxation, and red for holding the Qa-R SNAREs at constant force. The states associated with  
880 different extensions (marked by green dashed lines as needed) are numbered as in Figure 2D.  
881 CTD transitions are indicated by gray ovals, NTD unfolding by gray arrows, t-SNARE unfolding  
882 by black arrows, syntaxin transitions by blue rectangles, and template complex transitions by  
883 blue ovals. See also Figure 2-figure supplement 2.

884 (D) Schematic diagrams of different states: 1, fully assembled SNARE complex; 2, half-zipped  
885 SNARE bundle; 3, unzipped t-SNARE complex; 4, fully unfolded SNARE motifs; 5, unfolded  
886 SNARE motifs with Munc18-1 bound; 6, partially closed syntaxin; 7, template complex; 8,  
887 Munc18-1-stabilized partially-zipped SNARE complex containing SNAP-25; and 9, Munc18-  
888 1-bound assembled SNARE complex. The states are numbered according to the same convention  
889 throughout the text and figures.

890

891 **Figure 3. Stability, conformation, and folding kinetics of the template complex**



892 (A, D, E, I) Extension-time trajectories at constant mean forces with the WT template complex  
893 (A) or its variants containing indicated mutations in Munc18-1 (D), VAMP2 (E), or syntaxin (I).  
894 The red trace in A shows an exemplary idealized trajectory derived from hidden Markov  
895 modeling. Trajectories in A, D, E, and I share the same scale bars. See also Figure 3-figure  
896 supplement 1.

897 (B) Diagram illustrating the transition between the partially closed syntaxin state (state 6 in  
898 Figure 2D) and the template complex state (state 7); rates and energies are derived from panel C.

899 (C) Force-dependent unfolding probabilities (top) and transition rates (bottom). Best model fits  
900 (solid and dashed curves) reveal the stability and folding and unfolding rates of the template  
901 complex at zero force (Figure 4 and Table 1).

902 (F) Structural model of VAMP2 F77 anchored in the F-pocket in Munc18-1 composed of L247  
903 and T248, which is covered by Y473. The model is derived by superimposing the structures of  
904 Munc18-1:syntaxin (Figure 2B; 3C98) and Vps33:Nyv1 (5BV0).

905 (G) Sequence alignment showing F-pocket sequence conservation among SM proteins.

906 (H) Extension-time trajectory of the WT template complex at 5.7 pN. The Qa-R SNAREs were  
907 crosslinked between syntaxin L205C and VAMP2 Q36C (Figure 2A, open arrowhead). See also  
908 Figure 2-figure supplement 1.

909

910 **Figure 4. Stability of the template complex correlates with SNARE-mediated membrane**  
911 **fusion and neurotransmitter release.** The unfolding energy is derived from the work required  
912 to reversibly unfold the template complex (Rebane et al., 2016). The work is measured as the  
913 equilibrium force multiplied by the extension change associated with the template complex

914 transition. Numbers in parentheses after SNARE mutant names indicate the layer numbers  
915 associated with the corresponding mutations. Error bars indicate standard errors of the mean. See  
916 also Table 1 and Figure 3-figure supplement 1.

917

### 918 **Figure 5. Template complex facilitates snare assembly**

919 (A) Representative FECs obtained in the presence of 60 nM SNAP-25B. Red arrows in Figures  
920 5-7 mark SNARE complex assembly. FECs #2-5 represent consecutive rounds of manipulation  
921 of a single Qa-R SNARE conjugate. See also Figure 5-figure supplement 1.

922 (B) Probabilities of Munc18-1-independent ('spontaneous') SNARE assembly (blue bars),  
923 Munc18-1-chaperoned SNARE assembly (red bars), and SNARE misassembly (black bars).

924 (C) FECs obtained in 200 nM SNAP-25B in the absence or presence of Munc18-1. Arrows mark  
925 t-v zippering (blue), disassembly of the misfolded SNARE complex (black), and SNARE  
926 reassembly (red). FECs #1-4 are from a single Qa-R SNARE conjugate.

927 (D) Extension-time trajectories at the indicated constant mean forces showing SNARE assembly.  
928 All traces were extracted from FEC regions marked with correspondingly labeled red arrows in  
929 panels A and B. SNAP-25B-bound states are shown in magenta. See also Figure 5-figure  
930 supplement 2.

931

### 932 **Figure 6. Munc18-1 phosphomimetic and disease mutations altered chaperoned SNARE** 933 **assembly**

934 (A) FECs for Munc18-1 mutations with 0 nM (#1) or 60 nM (#2-8) SNAP-25B.

935 (B) Extension-time trajectories at the indicated constant mean forces, some of which (a-d) are  
936 extracted from panel A. In panels e and f, no template complex formation is observed.

937

938 **Figure 7. Munc18-1 does not significantly accelerate zippering between t- and v-SNAREs**

939 (A) FECs obtained by pulling single WT SNARE complexes in 2  $\mu$ M VAMP2 in the solution in  
940 the absence or presence of 2  $\mu$ M Munc18-1. Magenta arrows mark binding of the VAMP2  
941 molecules in the solution to the t-SNARE complexes generated by unzipping the ternary SNARE  
942 complex.

943 (B) Close-up view of an extension-time trajectory displaying VAMP2 binding in trans. The  
944 trajectory corresponds to the boxed pulling region in A. As observed previously (Ma et al., 2015;  
945 Zhang et al., 2016a), VAMP2 binding (indicated by the magenta arrow) induced folding of the  
946 disordered C-terminus of the t-SNARE complex, decreasing its extension by  $2.3 \pm 0.1$  nm and  
947 generating state 1' (see C). It took an average time ( $\Delta t$ ) of  $\sim 0.3$  s for the free VAMP2 in the  
948 solution to bind the t-SNARE complex.

949 (C) Diagram illustrating VAMP2 induced t-SNARE folding and extension shortening.

950

951 **Figure 8. Munc18-3 and Vps33 catalyze SNARE assembly via template complexes**

952 (A) FECs of the Munc18-3 or Vps33 cognate Qa-R SNARE conjugate in the presence of the  
953 indicated protein(s).

954 (B) Extension-time trajectories at the indicated constant mean forces, some of which (b, c, h, and  
955 i) are extracted from panel A.

956

957 **Table 1. Properties of the neuronal template complex.** The number in parenthesis is the  
 958 standard error of the mean.

959

| SNARE or SM       | Mutation or truncation         | Unfolding energy (k <sub>B</sub> T) | Equilibrium force <sup>a</sup> (pN) | Folding rate (s <sup>-1</sup> ) | Unfolding rate (s <sup>-1</sup> ) | Partially closed syntaxin <sup>b</sup> | Template formation <sup>c</sup> |     | SNAP-25 binding <sup>d</sup> |    |
|-------------------|--------------------------------|-------------------------------------|-------------------------------------|---------------------------------|-----------------------------------|----------------------------------------|---------------------------------|-----|------------------------------|----|
|                   |                                |                                     |                                     |                                 |                                   | Prob.                                  | Prob.                           | N   | Prob.                        | N  |
| <b>WT</b>         | -                              | 5.2 (0.1)                           | 5.1 (0.1)                           | 132                             | 0.7                               | 0.4                                    | 0.5                             | 346 | 0.7                          | 50 |
| <b>Munc18-1</b>   | L247R                          | 1.6 (0.3)                           | 2.3 (0.1)                           | -                               | -                                 | 0.3                                    | 0.3                             | 99  | 0.7                          | 6  |
|                   | T248G                          | 2.9 (0.2)                           | 3.1 (0.1)                           | -                               | -                                 | 0                                      | 0.3                             | 155 | 0.3                          | 16 |
|                   | L247A/T248G                    | <1.5 <sup>i</sup>                   | -                                   | -                               | -                                 | 0                                      | 0                               | 241 | -                            | -  |
|                   | S306D <sup>h</sup>             | 5.8 (0.1)                           | 5.6 (0.1)                           | 184                             | 0.6                               | 0.4                                    | 0.9                             | 123 | 0.9                          | 53 |
|                   | L307R                          | 4.1 (0.2)                           | 4.6 (0.1)                           |                                 |                                   | 0.07                                   | 0.43                            | 114 | 0.58                         | 19 |
|                   | S313D <sup>h</sup>             | 6.1 (0.2)                           | 5.7 (0.1)                           | 568                             | 1.5                               | 0.4                                    | 1                               | 162 | 0.8                          | 70 |
|                   | Δ324-339 <sup>e,f</sup>        | <1.5 <sup>i</sup>                   |                                     | -                               | -                                 | 0                                      | 0                               | 105 | 0                            | 0  |
|                   | D326K <sup>h</sup>             | 6.5 (0.2)                           | 5.7 (0.1)                           | 420                             | 0.6                               | 0.03                                   | 0.9                             | 103 | 1                            | 27 |
|                   | L341P <sup>g</sup>             | <1.5 <sup>i</sup>                   |                                     | -                               | -                                 | 0.06                                   | 0.04                            | 176 | 0.5                          | 4  |
|                   | P335A <sup>h</sup>             | 6.0 (0.3)                           | 5.9 (0.1)                           | 258                             | 0.5                               | 0.02                                   | 0.7                             | 155 | 0.9                          | 11 |
|                   | P335L <sup>g</sup>             | 4.3 (0.1)                           | 4.8 (0.1)                           | 17                              | 0.2                               | 0.4                                    | 0.3                             | 224 | 0.8                          | 36 |
|                   | L348R <sup>e,f</sup>           | <1.5 <sup>i</sup>                   |                                     | -                               | -                                 | 0.02                                   | 0.04                            | 222 | 0.7                          | 6  |
|                   | Y473D <sup>f</sup>             | 4.0 (0.1)                           | 4.3 (0.2)                           | -                               | -                                 | 0                                      | 0.1                             | 395 | 0.5                          | 24 |
| <b>VAMP2</b>      | L32G/Q33G                      | 3.4 (0.2)                           | 3.9 (0.1)                           | 310                             | 10                                | 0.4                                    | 0.6                             | 170 | 0.06                         | 33 |
|                   | V39D                           | 3.8 (0.4)                           | 3.9 (0.2)                           | 90                              | 2                                 | 0.3                                    | 0.1                             | 175 | 0.8                          | 13 |
|                   | M46A                           | 5.2 (0.4)                           | 5.1 (0.2)                           | 130                             | 0.7                               | 0.3                                    | 0.5                             | 52  | 0.8                          | 13 |
|                   | E62T <sup>e</sup>              | 4.1 (0.2)                           | 4.8 (0.2)                           | 107                             | 5                                 | 0.4                                    | 0.5                             | 104 | 0.4                          | 23 |
|                   | S61D/E62T <sup>e</sup>         | 3.6 (0.2)                           | 4.1 (0.1)                           |                                 |                                   | 0.4                                    | 0.7                             | 56  | 0.2                          | 12 |
|                   | Q76A <sup>e</sup>              | 4.7 (0.2)                           | 4.8 (0.1)                           | 166                             | 2                                 | 0.4                                    | 0.6                             | 62  | 0.3                          | 12 |
|                   | F77A <sup>f</sup>              | 1.5 (0.3)                           | 2.3                                 | -                               | -                                 | 0.5                                    | 0.1                             | 121 | 0.5                          | 6  |
|                   | A81G/A82G                      | 5.0 (0.3)                           | 4.9 (0.2)                           | 130                             | 0.8                               | 0.4                                    | 0.5                             | 149 | 0.4                          | 42 |
|                   | Δ85-94                         | 5.1 (0.2)                           | 5.0 (0.1)                           | 120                             | 0.7                               | 0.4                                    | 0.5                             | 87  | 0.7                          | 29 |
| <b>Syntaxin-1</b> | ΔNRD <sup>e,f</sup>            | <1.5 <sup>i</sup>                   | -                                   | -                               | -                                 | 0                                      | 0.08                            | 105 | 0.2                          | 12 |
|                   | ΔN-peptide <sup>e,f</sup>      | 3.2 (0.2)                           | 4.6 (0.1)                           | 42                              | 2                                 | 0.03                                   | 0.5                             | 328 | 0.4                          | 46 |
|                   | ΔH <sub>abc</sub> <sup>f</sup> | <1.5 <sup>i</sup>                   | -                                   | -                               | -                                 | 0                                      | 0.06                            | 140 | 0.5                          | 4  |

|            |                                |           |           |     |     |      |     |     |     |    |
|------------|--------------------------------|-----------|-----------|-----|-----|------|-----|-----|-----|----|
|            | L165A/E166A (LE) <sup>b</sup>  | 6.7 (0.2) | 6.1 (0.1) | 406 | 0.5 | 0.07 | 0.7 | 83  | 0.9 | 26 |
|            | LE/E76K                        | 6.4 (0.2) | 6.0 (0.2) | 123 | 0.2 | 0.07 | 0.9 | 81  | 0.7 | 30 |
|            | I202G/I203G                    | 3.0 (0.3) | 3.8 (0.1) | 240 | 12  | 0.4  | 0.5 | 177 | 0.4 | 33 |
|            | F216A                          | 3.7 (0.1) | 5.1 (0.1) | 82  | 2   | 0    | 0.6 | 155 | 0.9 | 32 |
|            | I230G/D231/R232G <sup>j</sup>  | 3.6 (0.2) | 4.3 (0.1) | -   | -   | 0    | 0.5 | 111 | 0.4 | 7  |
|            | I233G/E234G/Y235G <sup>j</sup> | 3.0 (0.2) | 4.1 (0.1) | -   | -   | 0    | 0.6 | 122 | 0.7 | 30 |
|            | V237G/E238G/H239G              | 5.2 (0.2) | 4.9 (0.1) | 124 | 0.7 | 0.01 | 0.3 | 182 | 0.4 | 14 |
|            | T251G/K252G                    | 5.2 (0.1) | 4.9 (0.1) | 126 | 0.7 | 0.5  | 0.8 | 197 | 0.7 | 47 |
|            | Δ255-264                       | 5.4 (0.2) | 5.1 (0.1) | 140 | 0.6 | 0.5  | 0.5 | 134 | 0.7 | 29 |
| Syntaxin-1 | L165A/E166A                    | 6.6 (0.2) | 6.2 (0.1) | 72  | 0.1 | 0.2  | 0.9 | 85  | 0.2 | 11 |
| Munc18-1   | D326K <sup>h</sup>             |           |           |     |     |      |     |     |     |    |

960

961 <sup>a</sup> Mean of two average forces for the unfolded and folded states when the two states are equally populated. The  
 962 equilibrium force of the template complex generally correlates with its unfolding energy.

963 <sup>b</sup> Detected as the syntaxin- and Munc18-1-dependent transition in the force range of 10-15 pN.

964 <sup>c</sup> Probability per relaxation or pulling measured in the absence of SNAP-25B. The number of events scored (N) is  
 965 the same for the corresponding template complex and partially closed syntaxin.

966 <sup>d</sup> upon formation of the template complex.

967 <sup>e</sup> Mutation that reduces membrane fusion in vitro (Parisotto et al., 2014; Shen et al., 2010; Shen et al., 2007).

968 <sup>f</sup> Mutation that abolishes or reduces exocytosis and neurotransmitter release in vivo (Meijer et al., 2018; Munch et  
 969 al., 2016; Walter et al., 2010).

970 <sup>g</sup> Mutation associated with epilepsy (Stamberger et al., 2016).

971 <sup>h</sup> Mutation that *enhances* membrane fusion in vitro or neurotransmitter release in the cell (Genc et al., 2014; Gerber  
 972 et al., 2008; Lai et al., 2017; Munch et al., 2016; Parisotto et al., 2014; Richmond et al., 2001).

973 <sup>i</sup> Unfolding energy below the detection limit of our method, estimated to be 1.5 k<sub>B</sub>T, or not available due to no,  
 974 infrequent, or heterogeneous template complex transition.

975 <sup>j</sup> In the observed template complex transition, the template complex frequently dwelled in the unfolded state for an  
 976 unusually long time (Figure 3-figure supplement 1). Thus, the transition is no longer two-state.

977

978

979

980 **Video 1. SNARE complex unfolding and subsequent template complex formation as**  
 981 **inferred from single-molecule measurements.**

982 The proposed state transitions associated with FEC #2 in Figure 2C or Figure 2-figure  
 983 supplement 2 are simulated.

984

985 **Video 2. Template complex facilitates SNAP-25B binding and SNARE assembly**

986 The extension at a constant mean force of 6.0 pN corresponding to trace c in Figure 5D and its  
987 associated state transition are simulated. For simplicity, only the right bead was simulated to  
988 move in response to SNARE conformational changes in Video 2-4. In reality, the left bead  
989 moved synchronously with the right bead, but in an opposite direction, as shown in Video 1.

990

991 **Video 3. Inferred conformational transition from closed syntaxin to the template complex.**

992

993 **Video 4. SNAP-25B binding to the template complex occasionally forms a partially**  
994 **zippered SNARE complex.**

995 The state transitions associated with the extension trace g in Figure 5D are simulated.

996

997 **SUPPLEMENTAL INFORMATION**

998

999 **Figure 2-figure supplement 1.** Sequences, domains, and crosslinking sites of the SNARE  
1000 proteins used in this study. The amino acids in hydrophobic layers (from -7 to +8) and the central  
1001 ionic layer (0 layer) are colored yellow. The underlined sequences are added to facilitate  
1002 crosslinking of Qa and R SNAREs, crosslinking of R SNAREs to DNA handles, and attachment  
1003 of Qa SNAREs to bead surfaces (Figure 2A). The pulling sites are indicated by arrows labeled  
1004 by F (for Force). The crosslinking sites are indicated by red rectangles or red lines. For neuronal  
1005 SNAREs, the three crosslinking sites tested are designated by their corresponding syntaxin  
1006 residues (R198C, I187C, and L205C, Figure 2B,C). N-terminal crosslinking facilitated formation  
1007 of the template complex by destabilizing the closed syntaxin, increasing the local SNARE

1008 concentrations, and minimizing nonspecific Munc18-1-VAMP2 and SNARE-SNARE  
1009 interactions (Brunger, 2005; Lai et al., 2017; Sitarska et al., 2017). To facilitate assembly of the  
1010 Qa-R conjugate and the SNARE-DNA tether, we typically crosslinked the Qa- and R-SNAREs  
1011 in purified SNARE complexes and then removed the Qbc-SNAREs by unfolding the complexes.  
1012 The force-extension curves (FECs) corresponding to the first pull to unfold these pre-assembled  
1013 SNARE complexes are shown in gray throughout the text.

1014

1015 **Figure 2-figure supplement 2.** Time-dependent extension (top panel), force (middle panel), and  
1016 trap separation (bottom panel) for a typical experiment to test template complex formation. Data  
1017 here and FECs #2 and #3 in Figure 2C are acquired on the same Qa-R SNARE conjugate, with  
1018 the same pulling round numbering. Close-up views of different time regions indicated by A-D  
1019 are shown: (A) Close-up view of the first round of pulling and relaxation. Regions of  
1020 characteristic transitions are indicated: the CTD transition by the gray oval, the NTD unfolding  
1021 by the gray arrow, the syntaxin unfolding and SNAP-25B dissociation by the black arrow, the  
1022 syntaxin open-partial closing transition by blue rectangle, and the template complex transition by  
1023 the blue oval. States associated with different extensions are indicated by the corresponding state  
1024 numbers (Figure 2D). Note that binding of Munc18-1 to the NRD in state 5 did not cause any  
1025 change in the extension of the Qa-R conjugate compared to the state 4, thus could not directly be  
1026 detected by our assay. (B) The extension-time trajectory demonstrates reversible partial closing  
1027 of syntaxin at a constant mean force of 12.6 pN. (C-D) Extension-time trajectories at two  
1028 constant trap separations or mean forces showing reversible folding and unfolding of the  
1029 template complex. Throughout the figures, all FECs and time-dependent trajectories were mean-

1030 filtered with a time window of 10 ms, except for the extension-time trajectories with syntaxin  
1031 opening-partial closing transitions, which were filtered with a time window of 3 ms.

1032

1033 **Figure 2-figure supplement 3.** Extension-time trajectories at two constant mean forces ( $F$ )  
1034 showing the opening-closing transition of the partially closed syntaxin molecule.

1035

1036 **Figure 2-figure supplement 4.** Force-dependent syntaxin opening probabilities (top panel) and  
1037 opening and closing rates (bottom panel) obtained by pulling syntaxin from the two N-terminal  
1038 sites, R198C and I187C (Figure 2-figure supplement 1). Curves are best model fits to derive the  
1039 energies and kinetics at zero force associated with the transitions, with solid curves for unfolding  
1040 and dashed curves for folding. The unfolding energies of the closed syntaxin ( $7.2 \pm 0.2$  k<sub>B</sub>T) and  
1041 of the partially closed syntaxin ( $2.6 \pm 0.2$  k<sub>B</sub>T) are much smaller than the dissociation energy  
1042 between syntaxin and Munc18-1 previously measured based on a two-state binding and  
1043 unbinding process ( $\sim 22$  k<sub>B</sub>T) (Burkhardt et al., 2008; Sitarska et al., 2017). Our data revealed an  
1044 intermediate state for the association and dissociation process, in which syntaxin is open, but  
1045 Munc18-1 remains bound to syntaxin, likely to the NRD (Ma et al., 2015) (Figure 2D, state 5).

1046

1047 **Figure 2-figure supplement 5.** FECs of Qa only (#1) or the Qa-R SNARE conjugate (other  
1048 FECs) pulled from Site I187C in the absence (-) or presence (+) of 2  $\mu$ M Munc18-1 or 60 nM  
1049 SNAP-25B. The wide-type (“WT”) syntaxin-1 here denotes syntaxin-1A (a.a. 1-265, I187C,  
1050 C145S; see “SNARE protein constructs”), with additional mutations indicated. FECs in each  
1051 bracket were obtained on the same Qa-R conjugate. Different transitions are marked: blue dashed  
1052 parallelograms for syntaxin opening-closing transitions, blue dashed ovals for template complex



1053 transitions, and the red arrow for SNAP-25B binding and full SNARE assembly. To pull  
1054 syntaxin alone, we directly crosslinked the DNA handle to syntaxin I187C in the absence of  
1055 VAMP2. The resultant FEC (#1) revealed the same high-force transition as those obtained by  
1056 pulling the Qa-R conjugate crosslinked at I187C, indicating that the high-force transition indeed  
1057 resulted from transition of syntaxin alone (compare to the syntaxin transition in #2-3). The WT  
1058 syntaxin was fully closed by Munc18-1, which inhibited formation of the template complex (#2-  
1059 3) in the absence of SNAP-25B (#2) and in the presence of SNAP-25B (#3). Munc18-1 mutation  
1060 D326K destabilized the closed syntaxin, but was not sufficient to open the closed syntaxin for  
1061 template complex formation (#4). The LE mutation (L165A/E166A) decreased the extension  
1062 change associated with the syntaxin transition (compare #5 to #1-3), indicating that the LE  
1063 mutation destabilized the closed syntaxin conformation (Burkhardt et al., 2008). Nevertheless,  
1064 neither template complex formation (#5 and #6) nor Munc18-1-chaperoned SNARE assembly  
1065 (#6) was observed, suggesting that syntaxin with the LE mutation is still largely closed,  
1066 consistent with recent results (Colbert et al., 2013). Therefore, we made an additional mutation  
1067 E76K that was expected to further weaken the closed syntaxin conformation (Figure 2B). Indeed,  
1068 the combined mutation partially opened the syntaxin conformation and promoted formation of  
1069 the template complex, as seen from small high force transition and appearance of the low force  
1070 transition, respectively (#7 and #8). Correspondingly, Munc18-1-chaperoned SNARE assembly  
1071 was observed in the presence of SNAP-25B (red arrow) in a manner that depended on the  
1072 template complex (#9 and #10). Under this condition, the probabilities of detecting the partially  
1073 closed syntaxin and the template complex were 0.66 and 0.39, respectively, and the probability  
1074 of detecting SNARE assembly after template complex formation was 0.48.  
1075

1076 **Figure 2-figure supplement 6.** Extension-time trajectories at two constant mean forces (F)  
1077 showing the opening-closing transition of the syntaxin molecule pulled from the crosslinking site  
1078 I187C (Figure 2-figure supplement 1). The red curves are idealized state transitions derived from  
1079 hidden-Markov modeling. State 6' represents the fully closed syntaxin (Figure 2B).

1080

1081

1082 **Figure 2-figure supplement 7.** Extension-time trajectories showing conformational transitions  
1083 of the template complex transition pulled from Site I187C in the absence (top trace) and presence  
1084 (bottom) of 60 nM SNAP-25B. The unfolding energy of the template complex crosslinked at  
1085 I187C is estimated to be  $4.8 \pm 0.3$  k<sub>B</sub>T, close to the unfolding energy of  $5.2 \pm 0.1$  k<sub>B</sub>T of the  
1086 template complex crosslinked at R198C. Furthermore, in the presence of SNAP-25B, the  
1087 template complex facilitates SNAP-25B binding and SNARE assembly (red arrow).

1088

1089 **Figure 3-figure supplement 1.** FECs obtained in the presence of 2 μM Munc18-1. Dashed blue  
1090 ovals mark template complex transitions. Note that the partially closed syntaxin state was  
1091 abrogated by modifications that are known to destabilize the closed syntaxin, including syntaxin  
1092 ΔNRD (Burkhardt et al., 2008), the LE mutation (Dulubova et al., 1999; Ma et al., 2011), and  
1093 Munc18-1 Δ324-339, P335L, and D326K (Munch et al., 2016; Parisotto et al., 2014; Sitarska et  
1094 al., 2017) (Table 1). For syntaxin LE mutation and I230G/D231/R232G and Munc18-1 P335A  
1095 and D326K, template complexes generally formed directly from the open syntaxin (Table 1).

1096

1097 **Figure 3-figure supplement 2.** Circular Dichroism (CD) spectra show that mutations barely  
1098 alter Munc18-1 folding. The CD spectra of Munc18-1 mutants that abolished or weakened the

1099 template complex are shown, including Munc18-1 F-pocket mutations L247R, T248G,  
1100 L247A/T248G, disease-related mutations L341P and P335L, phosphomimetic mutation Y473D,  
1101 and L348R (Parisotto et al., 2014). All of the mutant proteins displayed CD spectra closely  
1102 resembling that of wild-type Munc18-1.

1103

1104 **Figure 3-figure supplement 3.** Snapshots of the extension-time trajectories at constant mean  
1105 forces showing sporadic folding of the template complex in the absence of syntaxin NRD.

1106

1107 **Figure 5-figure supplement 1.** FECs obtained in the presence of 2  $\mu$ M Munc18-1 and 60 nM  
1108 SNAP-25B in the solution. Red arrows mark events of SNAP-25B binding and SNARE  
1109 assembly. Note that syntaxin +2 layer mutation I233G/E234G/Y235G significantly weakens the  
1110 CTD zippering.

1111

1112 **Figure 5-figure supplement 2.** Extension-time trajectories at constant mean forces (F)  
1113 exhibiting reversible folding and unfolding transitions of the mutant template complexes and  
1114 irreversible SNAP-25 binding (indicated by red arrows).

1115

1116 **Figure 8-figure supplement 1.** FECs obtained by pulling and relaxing a single syntaxin-4-  
1117 VAMP2 conjugate (#1-4) or Vam3-Nyv1 conjugate (#5-8) in the presence of the indicated  
1118 protein or proteins. SNARE CTD transitions and template complex transitions are marked by  
1119 gray and blue ovals, respectively. Gray arrows indicate SNARE unzipping. Vps33( $\Delta$ 354-376) is  
1120 analogous to Munc18-1  $\Delta$ 324-339 and is inactive in vivo and in vitro (Baker et al., 2015).

1121

1122 **Figure 8-figure supplement 2.** FECs displaying Vps33-catalyzed vacuolar SNARE assembly,  
1123 marked by red arrows. Red arrows indicate SNARE unzipping. Template complex transitions are  
1124 marked by blue ovals.

1125  
1126 **Figure 8-figure supplement 3.** Probabilities of SNARE assembly per relaxation under different  
1127 conditions. The insert shows the pulling direction and the region of the Vps33 truncation  
1128 (yellow).

1129

1130

1131

## 1132 **References**

1133

1134

1135 Baker, R.W., and Hughson, F.M. (2016). Chaperoning SNARE assembly and disassembly. *Nat*  
1136 *Rev Mol Cell Biol* *17*, 465-479.

1137 Baker, R.W., Jeffrey, P.D., Zick, M., Phillips, B.P., Wickner, W.T., and Hughson, F.M. (2015).  
1138 A direct role for the Sec1/Munc18-family protein Vps33 as a template for SNARE assembly.  
1139 *Science* *349*, 1111-1114.

1140 Bao, H., Das, D., Courtney, N.A., Jiang, Y., Briguglio, J.S., Lou, X., Roston, D., Cui, Q., Chanda,  
1141 B., and Chapman, E.R. (2018). Dynamics and number of trans-SNARE complexes determine  
1142 nascent fusion pore properties. *Nature* *554*, 260-263.

1143 Brunger, A.T. (2005). Structure and function of SNARE and SNARE-interacting proteins. *Q.*  
1144 *Rev. Biophys.* *38*, 1-47.

1145 Brunger, A.T., Choi, U.B., Lai, Y., Leitz, J., and Zhou, Q.J. (2018). Molecular mechanisms of  
1146 fast neurotransmitter release. *Ann Rev Biophys* *47*, 469-497.

1147 Bryant, N.J., and Gould, G.W. (2011). SNARE proteins underpin insulin-regulated GLUT4  
1148 traffic. *Traffic* *12*, 657-664.

1149 Burkhardt, P., Hattendorf, D.A., Weis, W.I., and Fasshauer, D. (2008). Munc18a controls  
1150 SNARE assembly through its interaction with the syntaxin N-peptide. *EMBO J.* *27*, 923-933.

- 1151 Colbert, K.N., Hattendorf, D.A., Weiss, T.M., Burkhardt, P., Fasshauer, D., and Weis, W.I.  
1152 (2013). Syntaxin1a variants lacking an N-peptide or bearing the LE mutation bind to Munc18a in  
1153 a closed conformation. *Proc. Natl. Acad. Sci. U.S.A.* *110*, 12637-12642.
- 1154 Cote, M., Menager, M.M., Burgess, A., Mahlaoui, N., Picard, C., Schaffner, C., Al-Manjomi, F.,  
1155 Al-Harbi, M., Alangari, A., Le Deist, F., *et al.* (2009). Munc18-2 deficiency causes familial  
1156 hemophagocytic lymphohistiocytosis type 5 and impairs cytotoxic granule exocytosis in patient  
1157 NK cells. *J. Clin. Invest.* *119*, 3765-3773.
- 1158 Dawidowski, D., and Cafiso, D.S. (2016). Munc18-1 and the Syntaxin-1 N terminus regulate  
1159 open-closed states in a t-SNARE complex. *Structure* *24*, 392-400.
- 1160 Dulubova, I., Khvotchev, M., Liu, S.Q., Huryeva, I., Sudhof, T.C., and Rizo, J. (2007). Munc18-  
1161 1 binds directly to the neuronal SNARE complex. *Proc. Natl. Acad. Sci. U.S.A.* *104*, 2697-2702.
- 1162 Dulubova, I., Sugita, S., Hill, S., Hosaka, M., Fernandez, I., Sudhof, T.C., and Rizo, J. (1999). A  
1163 conformational switch in syntaxin during exocytosis: role of munc18. *EMBO J.* *18*, 4372-4382.
- 1164 Dulubova, I., Yamaguchi, T., Wang, Y., Sudhof, T.C., and Rizo, J. (2001). Vam3p structure  
1165 reveals conserved and divergent properties of syntaxins. *Nat. Struct. Biol.* *8*, 258-264.
- 1166 Fasshauer, D., Sutton, R.B., Brunger, A.T., and Jahn, R. (1998). Conserved structural features of  
1167 the synaptic fusion complex: SNARE proteins reclassified as Q- and R-SNAREs. *Proc. Natl.*  
1168 *Acad. Sci. U.S.A.* *95*, 15781-15786.
- 1169 Gao, Y., Zorman, S., Gundersen, G., Xi, Z.Q., Ma, L., Sirinakis, G., Rothman, J.E., and Zhang,  
1170 Y.L. (2012). Single reconstituted neuronal SNARE complexes zipper in three distinct stages.  
1171 *Science* *337*, 1340-1343.
- 1172 Genc, O., Kochubey, O., Toonen, R.F., Verhage, M., and Schneggenburger, R. (2014). Munc18-  
1173 1 is a dynamically regulated PKC target during short-term enhancement of transmitter release.  
1174 *Elife* *3*, e01715.
- 1175 Gerber, S.H., Rah, J.C., Min, S.W., Liu, X.R., de Wit, H., Dulubova, I., Meyer, A.C., Rizo, J.,  
1176 Arancillo, M., Hammer, R.E., *et al.* (2008). Conformational switch of syntaxin-1 controls  
1177 synaptic vesicle fusion. *Science* *321*, 1507-1510.
- 1178 Hu, S.H., Christie, M.P., Saez, N.J., Latham, C.F., Jarrott, R., Lua, L.H.L., Collins, B.M., and  
1179 Martin, J.L. (2011). Possible roles for Munc18-1 domain 3a and Syntaxin1 N-peptide and C-  
1180 terminal anchor in SNARE complex formation. *Proc. Natl. Acad. Sci. U.S.A.* *108*, 1040-1045.
- 1181 Jakhanwal, S., Lee, C.T., Urlaub, H., and Jahn, R. (2017). An activated Q-SNARE/SM protein  
1182 complex as a possible intermediate in SNARE assembly. *EMBO J.* *36*, 1788-1802.
- 1183 Jiao, J.Y., Rebane, A.A., Ma, L., and Zhang, Y.L. (2017). Single-molecule protein folding  
1184 experiments using high-resolution optical tweezers. *Methods Mol Biol* *1486*, 357-390.

- 1185 Lai, Y., Choi, U.B., Leitz, J., Rhee, H.J., Lee, C., Altas, B., Zhao, M.L., Pfuetzner, R.A., Wang,  
1186 A.L., Brose, N., *et al.* (2017). Molecular mechanisms of synaptic vesicle priming by Munc13 and  
1187 Munc18. *Neuron* *95*, 591-607.
- 1188 Ma, C., Li, W., Xu, Y., and Rizo, J. (2011). Munc13 mediates the transition from the closed  
1189 syntaxin-Munc18 complex to the SNARE complex. *Nat Struct Mol Biol* *18*, 542-549.
- 1190 Ma, C., Su, L.J., Seven, A.B., Xu, Y.B., and Rizo, J. (2013). Reconstitution of the vital functions  
1191 of Munc18 and Munc13 in neurotransmitter release. *Science* *339*, 421-425.
- 1192 Ma, L., Rebane, A.A., Yang, G., Xi, Z., Kang, Y., Gao, Y., and Zhang, Y.L. (2015). Munc18-1-  
1193 regulated stage-wise SNARE assembly underlying synaptic exocytosis. *eLIFE* *4*, e09580.
- 1194 McKinney, S.A., Joo, C., and Ha, T. (2006). Analysis of single-molecule FRET trajectories  
1195 using hidden Markov modeling. *Biophys. J.* *91*, 1941-1951.
- 1196 Meijer, M., Burkhardt, P., de Wit, H., Toonen, R.F., Fasshauer, D., and Verhage, M. (2012).  
1197 Munc18-1 mutations that strongly impair SNARE-complex binding support normal synaptic  
1198 transmission. *EMBO J.* *31*, 2156-2168.
- 1199 Meijer, M., Dorr, B., Lammertse, H.C.A., Blithikioti, C., van Weering, J.R.T., Toonen, R.F.G.,  
1200 Sollner, T.H., and Verhage, M. (2018). Tyrosine phosphorylation of Munc18-1 inhibits synaptic  
1201 transmission by preventing SNARE assembly. *EMBO J.* *37*, 300-320.
- 1202 Misura, K.M.S., Scheller, R.H., and Weis, W.I. (2000). Three-dimensional structure of the  
1203 neuronal-Sec1-syntaxin 1a complex. *Nature* *404*, 355-362.
- 1204 Mohrmann, R., de Wit, H., Verhage, M., Neher, E., and Sorensen, J.B. (2010). Fast vesicle  
1205 fusion in living cells requires at least three SNARE complexes. *Science* *330*, 502-505.
- 1206 Morey, C., Kienle, C.N., Klopffer, T.H., Burkhardt, P., and Fasshauer, D. (2017). Evidence for a  
1207 conserved inhibitory binding mode between the membrane fusion assembly factors Munc18 and  
1208 syntaxin in animals. *J. Biol. Chem.* *292*, 20449-20460.
- 1209 Munch, A.S., Kedar, G.H., van Weering, J.R.T., Vazquez-Sanchez, S., He, E.Q., Andre, T.,  
1210 Braun, T., Sollner, T.H., Verhage, M., and Sorensen, J.B. (2016). Extension of Helix 12 in  
1211 Munc18-1 induces vesicle priming. *J. Neurosci.* *36*, 6881-6891.
- 1212 Parisotto, D., Pfau, M., Scheutzow, A., Wild, K., Mayer, M.P., Malsam, J., Sinning, I., and  
1213 Sollner, T.H. (2014). An extended helical conformation in domain 3a of Munc18-1 provides a  
1214 template for SNARE (soluble N-ethylmaleimidesensitive factor attachment protein receptor)  
1215 complex assembly. *J. Biol. Chem.* *289*, 9639-9650.
- 1216 Pobbati, A.V., Stein, A., and Fasshauer, D. (2006). N- to C-terminal SNARE complex assembly  
1217 promotes rapid membrane fusion. *Science* *313*, 673-676.
- 1218 Rebane, A.A., Ma, L., and Zhang, Y.L. (2016). Structure-based derivation of protein folding  
1219 intermediates and energies from optical tweezers. *Biophys J* *110*, 441-454.

- 1220 Rebane, A.A., Wang, B., Ma, L., Qu, H., Coleman, J., Krishnakumar, S.S., Rothman, J.E., and  
1221 Zhang, Y.L. (2018). Two disease-causing SNAP-25B mutations selectively impair SNARE C-  
1222 terminal assembly. *J. Mol. Biol.* *430*, 479-490.
- 1223 Richmond, J.E., Weimer, R.M., and Jorgensen, E.M. (2001). An open form of syntaxin bypasses  
1224 the requirement for UNC-13 in vesicle priming. *Nature* *412*, 338-341.
- 1225 Rizo, J., and Sudhof, T.C. (2012). The membrane fusion enigma: SNAREs, Sec1/Munc18  
1226 proteins, and their accomplices-guilty as charged? *Annu. Rev. Cell. Dev. Biol.* *28*, 279-308.
- 1227 Shen, J.S., Rathore, S.S., Khandan, L., and Rothman, J.E. (2010). SNARE bundle and syntaxin  
1228 N-peptide constitute a minimal complement for Munc18-1 activation of membrane fusion. *J. Cell*  
1229 *Biol.* *190*, 55-63.
- 1230 Shen, J.S., Tareste, D.C., Paumet, F., Rothman, J.E., and Melia, T.J. (2007). Selective activation  
1231 of cognate SNAREpins by Sec1/Munc18 proteins. *Cell* *128*, 183-195.
- 1232 Sitarska, E., Xu, J.J., Park, S., Liu, X.X., Quade, B., Stepien, K., Sugita, K., Brautigam, C.A.,  
1233 Sugita, S., and Rizo, J. (2017). Autoinhibition of Munc18-1 modulates synaptobrevin binding  
1234 and helps to enable Munc13-dependent regulation of membrane fusion. *Elife* *6*, e24278.
- 1235 Sollner, T., Whiteheart, S.W., Brunner, M., Erdjument-Bromage, H., Geromanos, S., Tempst, P.,  
1236 and Rothman, J.E. (1993). SNAP receptors implicated in vesicle targeting and fusion. *Nature* *362*,  
1237 318-324.
- 1238 Stamberger, H., Nikanorova, M., Willemsen, M.H., Accorsi, P., Angriman, M., Baier, H.,  
1239 Benkel-Herrenbrueck, I., Benoit, V., Budetta, M., Caliebe, A., *et al.* (2016). STXBP1  
1240 encephalopathy: A neurodevelopmental disorder including epilepsy. *Neurology* *86*, 954-962.
- 1241 Sudhof, T.C., and Rothman, J.E. (2009). Membrane fusion: grappling with SNARE and SM  
1242 proteins. *Science* *323*, 474-477.
- 1243 Sutton, R.B., Fasshauer, D., Jahn, R., and Brunger, A.T. (1998). Crystal structure of a SNARE  
1244 complex involved in synaptic exocytosis at 2.4 angstrom resolution. *Nature* *395*, 347-353.
- 1245 Verhage, M., Maia, A.S., Plomp, J.J., Brussaard, A.B., Heeroma, J.H., Vermeer, H., Toonen,  
1246 R.F., Hammer, R.E., van den Berg, T.K., Missler, M., *et al.* (2000). Synaptic assembly of the  
1247 brain in the absence of neurotransmitter secretion. *Science* *287*, 864-869.
- 1248 Walter, A.M., Wiederhold, K., Bruns, D., Fasshauer, D., and Sorensen, J.B. (2010).  
1249 Synaptobrevin N-terminally bound to syntaxin-SNAP-25 defines the primed vesicle state in  
1250 regulated exocytosis. *J. Cell Biol.* *188*, 401-413.
- 1251 Wang, S., Choi, U.B., Gong, J.H., Yang, X.Y., Li, Y., Wang, A.L., Yang, X.F., Brunger, A.T.,  
1252 and Ma, C. (2017). Conformational change of syntaxin linker region induced by Munc13s  
1253 initiates SNARE complex formation in synaptic exocytosis. *EMBO J.* *36*, 816-829.

- 1254 Weber, T., Zemelman, B.V., McNew, J.A., Westermann, B., Gmachl, M., Parlati, F., Sollner,  
1255 T.H., and Rothman, J.E. (1998). SNAREpins: Minimal machinery for membrane fusion. *Cell* 92,  
1256 759-772.
- 1257 Wickner, W. (2010). Membrane fusion: Five lipids, four SNAREs, three chaperones, two  
1258 nucleotides, and a Rab, all dancing in a ring on yeast vacuoles. *Annu Rev Cell Dev Bi* 26, 115-  
1259 136.
- 1260 Yang, X.Y., Wang, S., Sheng, Y., Zhang, M.S., Zou, W.J., Wu, L.J., Kang, L.J., Rizo, J., Zhang,  
1261 R.G., Xu, T., *et al.* (2015). Syntaxin opening by the MUN domain underlies the function of  
1262 Munc13 in synaptic-vesicle priming. *Nat. Struct. Mol. Biol.* 22, 547-754.
- 1263 Zhang, X.M., Rebane, A.A., Ma, L., Li, F., Jiao, J., Qu, H., Pincet, F., Rothman, J.E., and Zhang,  
1264 Y.L. (2016a). Stability, folding dynamics, and long-range conformational transition of the  
1265 synaptic t-SNARE complex. *Proc. Natl. Acad. Sci. U.S.A.* 113, E8031-E8040.
- 1266 Zhang, Y., Diao, J., Colbert, K.N., Lai, Y., Pfuetzner, R.A., Padolina, M.S., Vivona, S., Ressler, S.,  
1267 Cipriano, D.J., Choi, U.B., *et al.* (2015). Munc18a does not alter fusion rates mediated by  
1268 neuronal snares, synaptotagmin, and complexin. *J Biol Chem* 290, 10518-10534.
- 1269 Zhang, Y.L., Jiao, J., and Rebane, A.A. (2016b). Hidden Markov modeling with detailed balance  
1270 and its application to single protein folding *Biophys J* 111, 2110-2124.
- 1271 Zhou, P., Pang, Z.P.P., Yang, X.F., Zhang, Y.S., Rosenmund, C., Bacaj, T., and Sudhof, T.C.  
1272 (2013). Syntaxin-1 N-peptide and H<sub>abc</sub>-domain perform distinct essential functions in synaptic  
1273 vesicle fusion. *EMBO J.* 32, 159-171.
- 1274 Zorman, S., Rebane, A.A., Ma, L., Yang, G.C., Molski, M.A., Coleman, J., Pincet, F., Rothman,  
1275 J.E., and Zhang, Y.L. (2014). Common intermediates and kinetics, but different energetics, in the  
1276 assembly of SNARE proteins. *Elife* 3, e03348.
- 1277



Figure 1

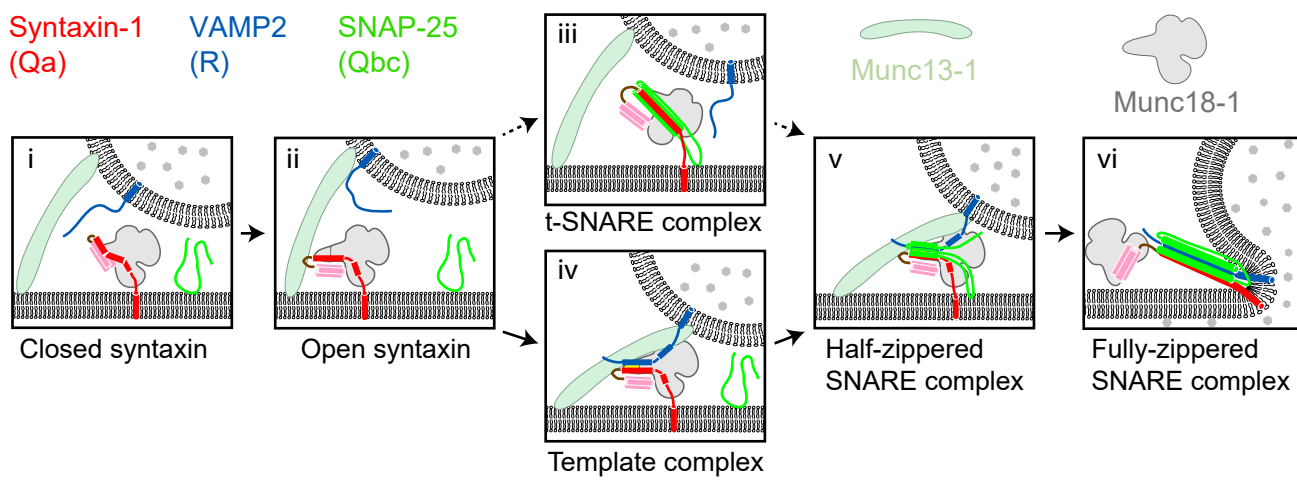

**Figure 2**

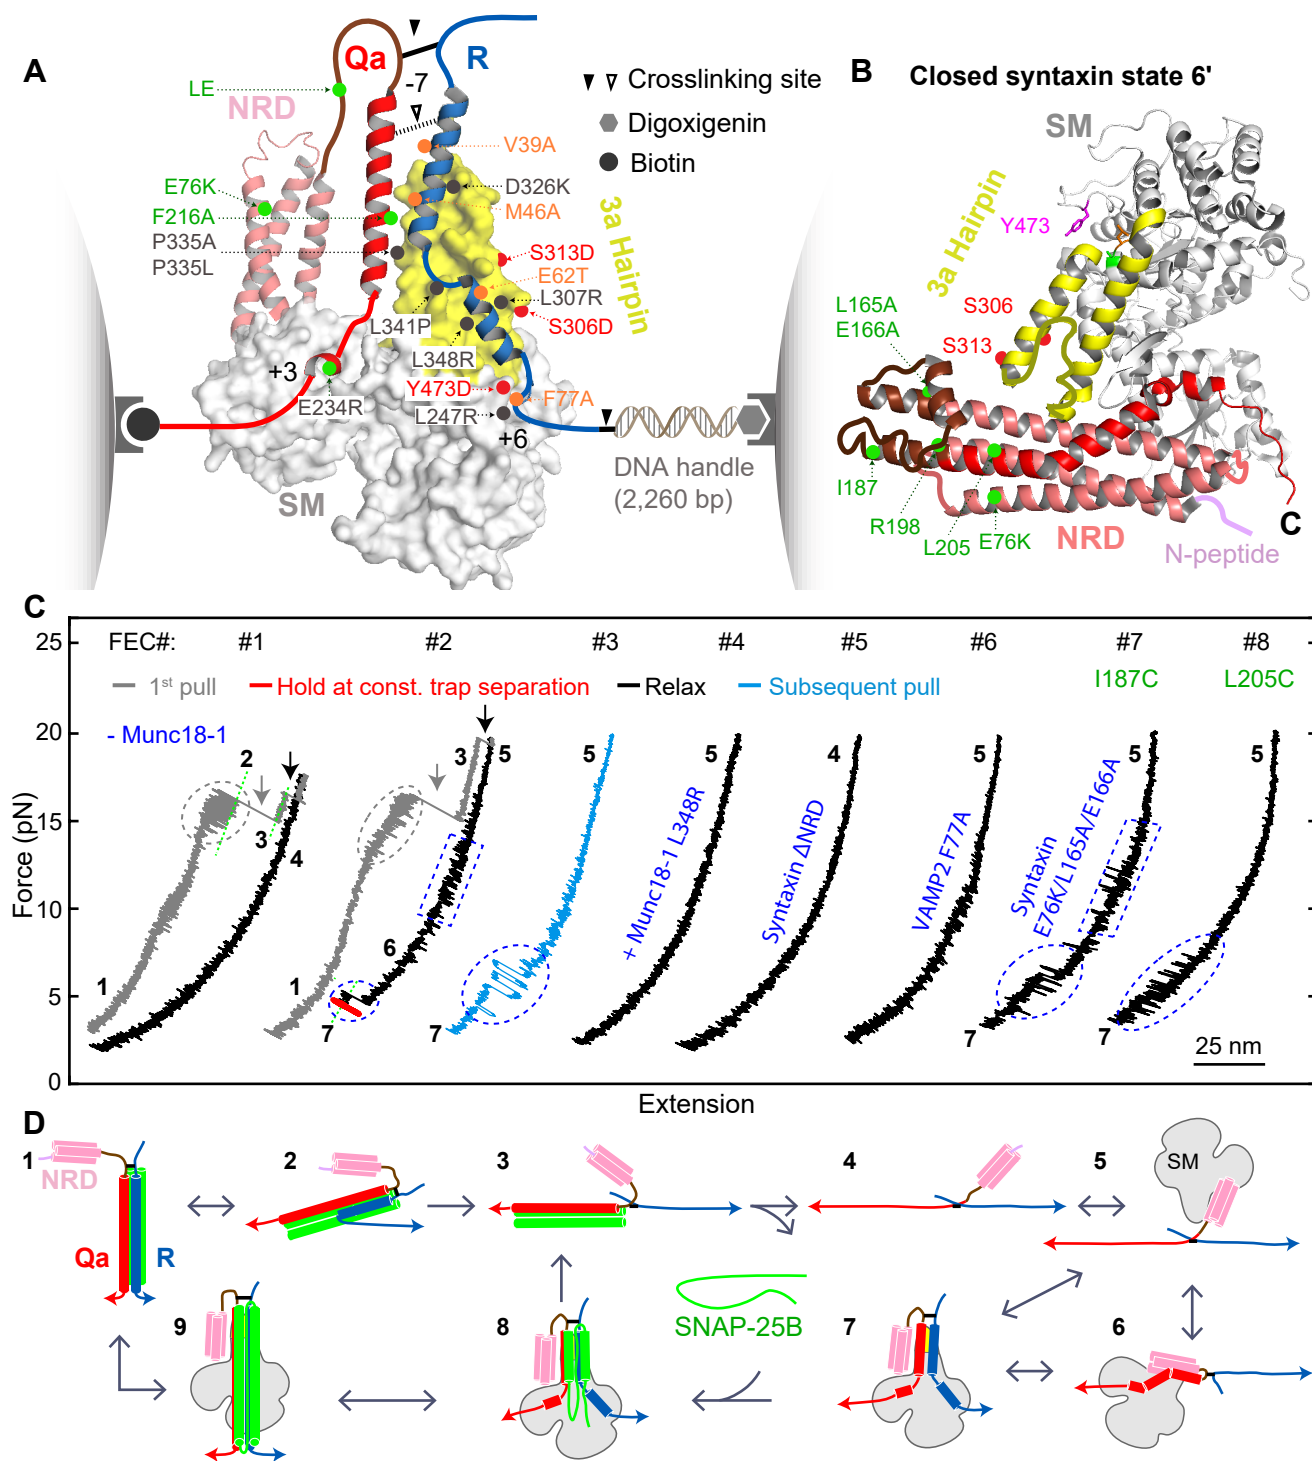

**Figure 3**

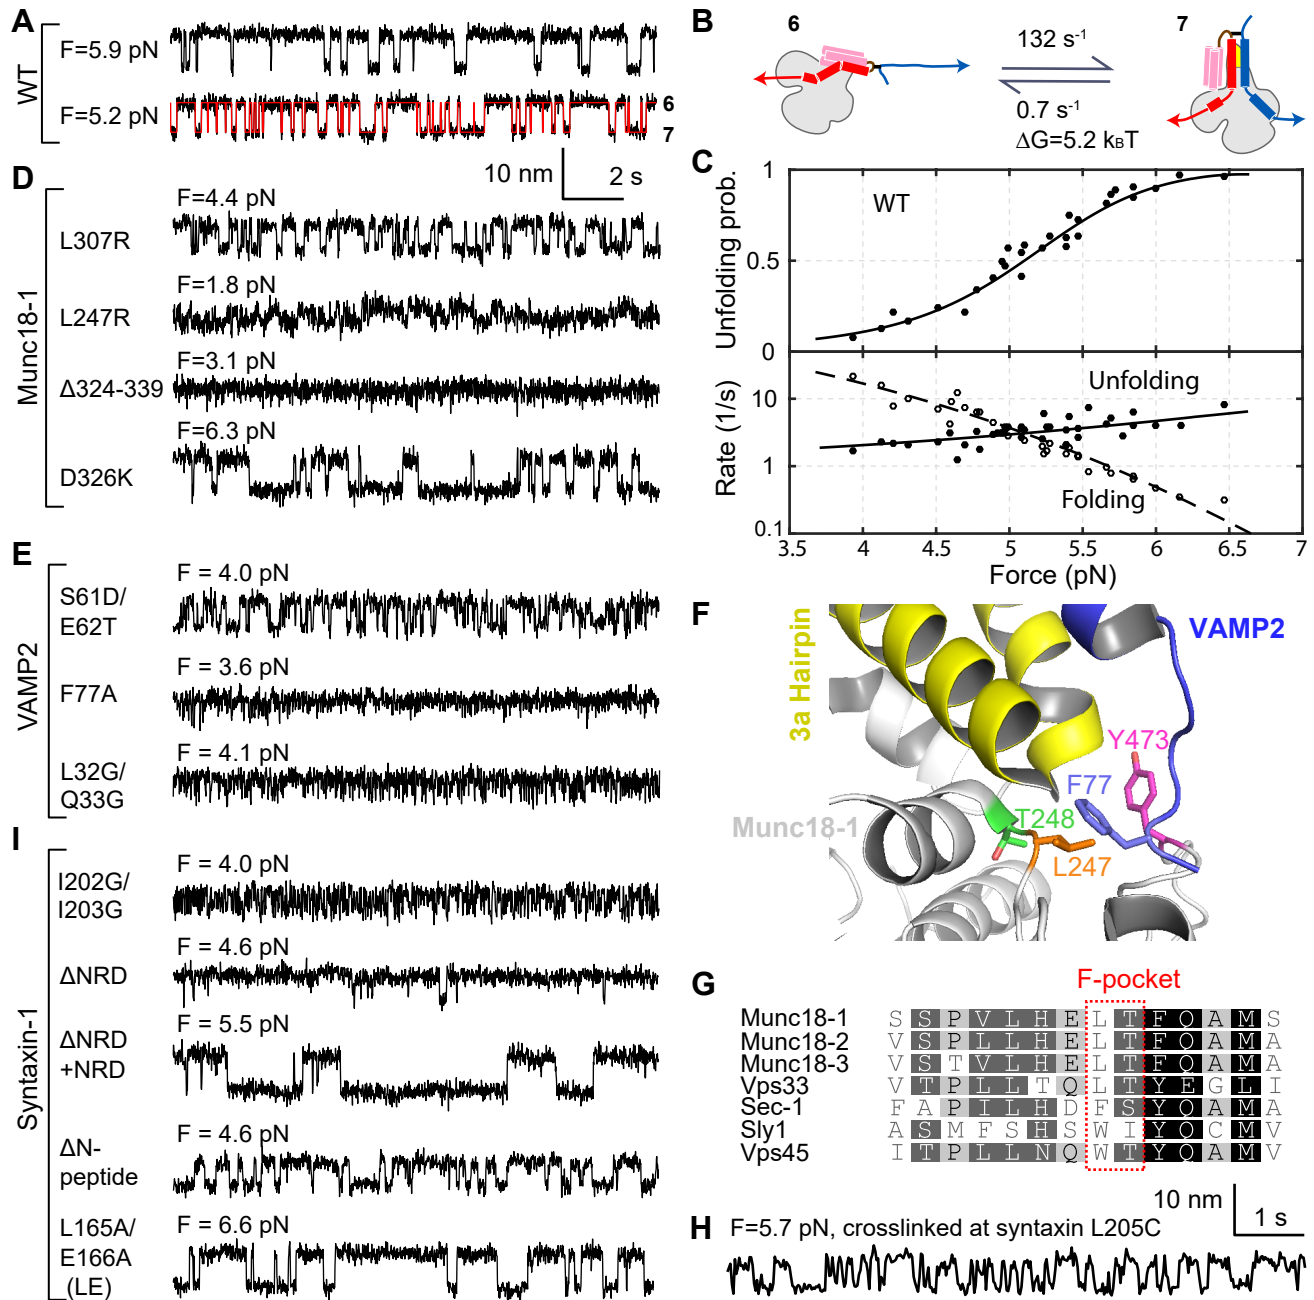

**Figure 4**

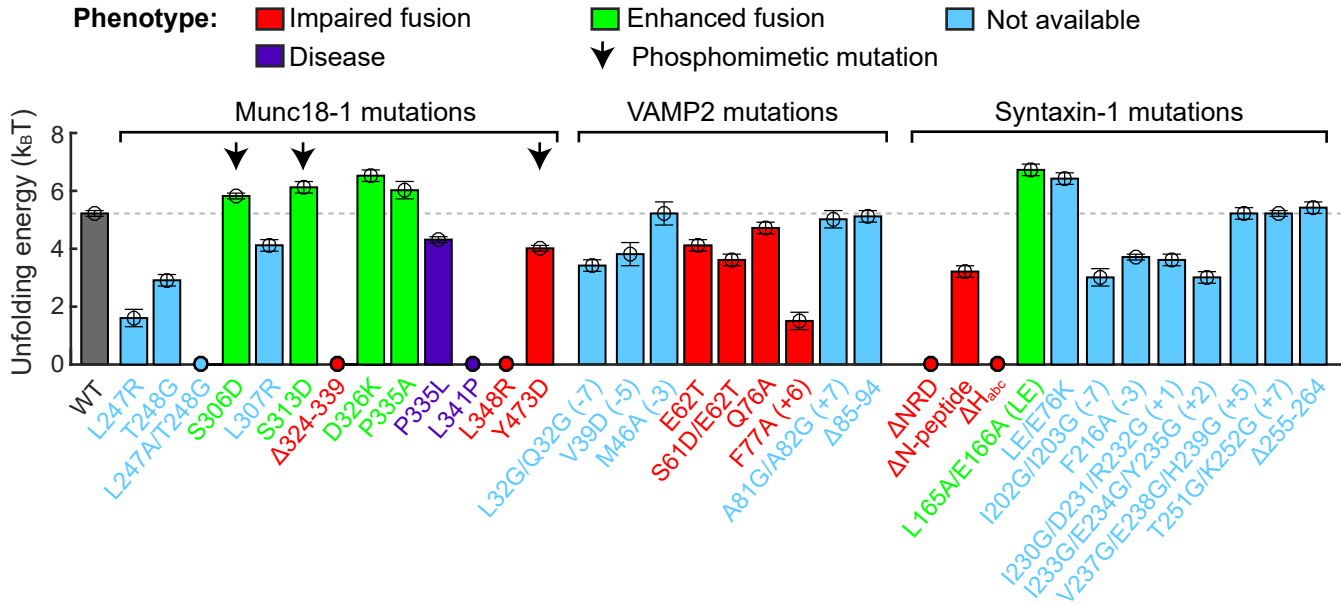

## Figure 5

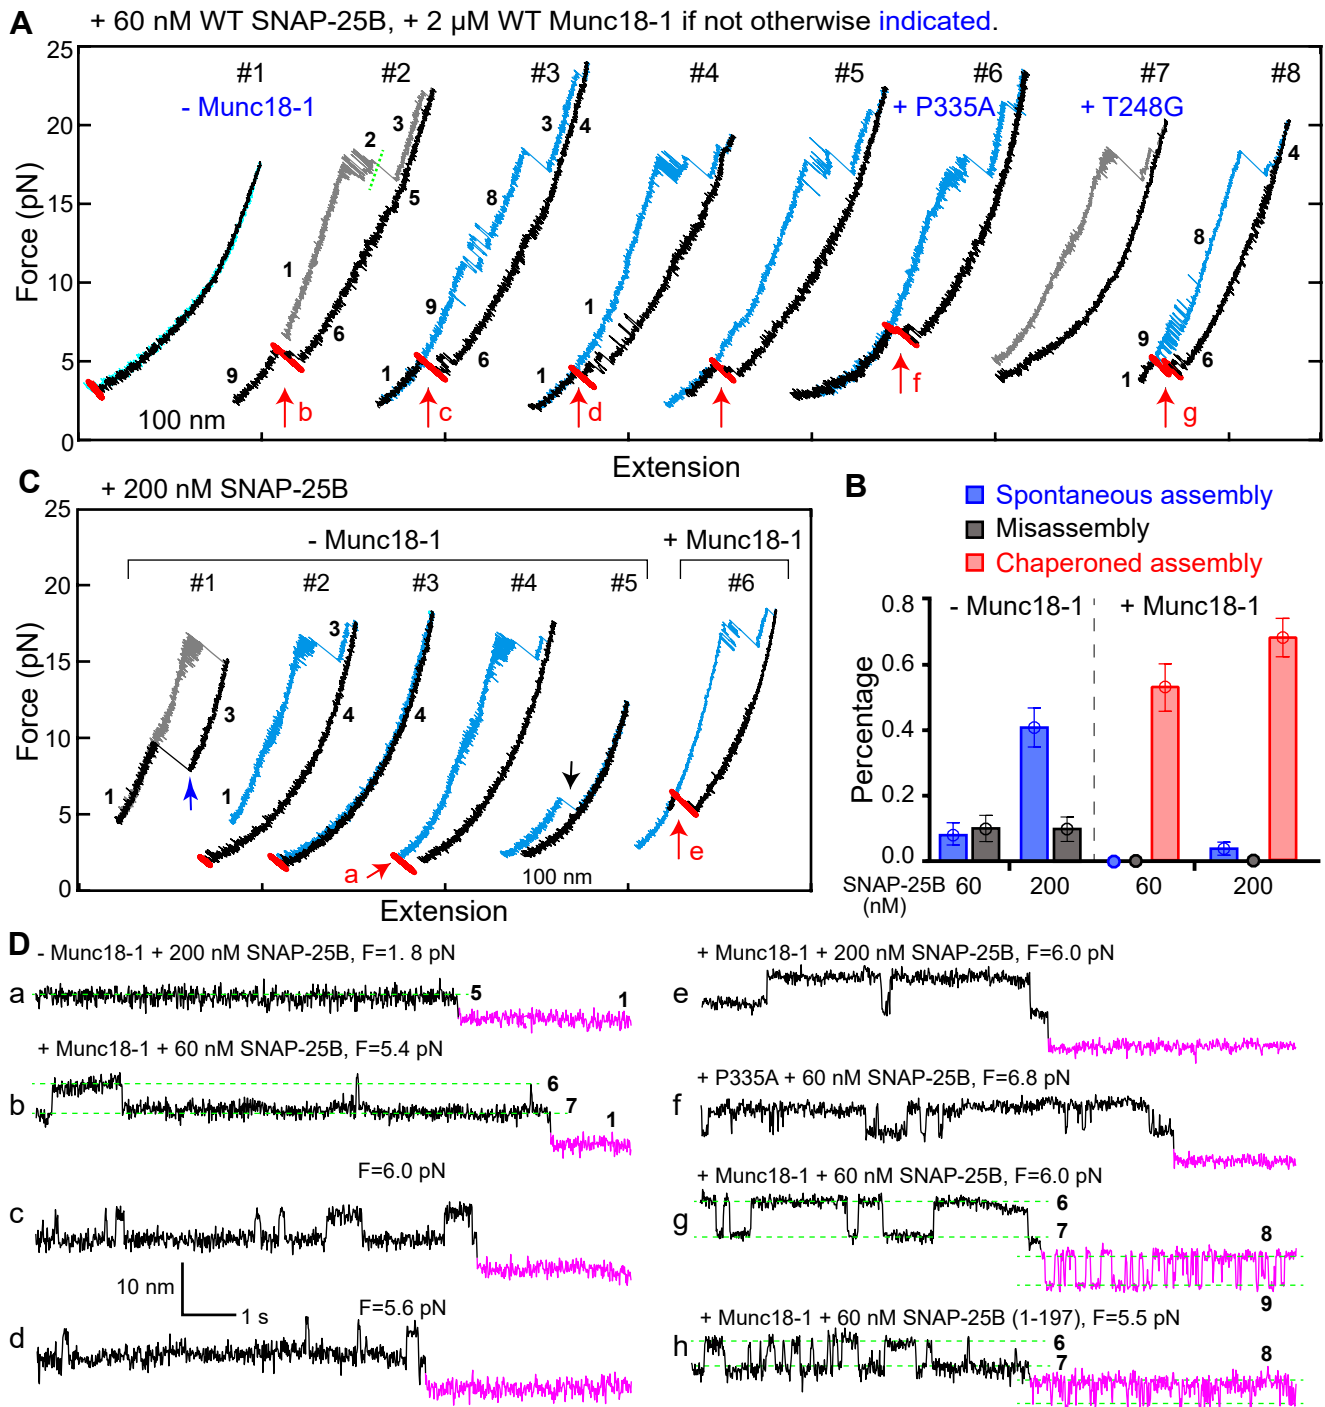

**Figure 6**

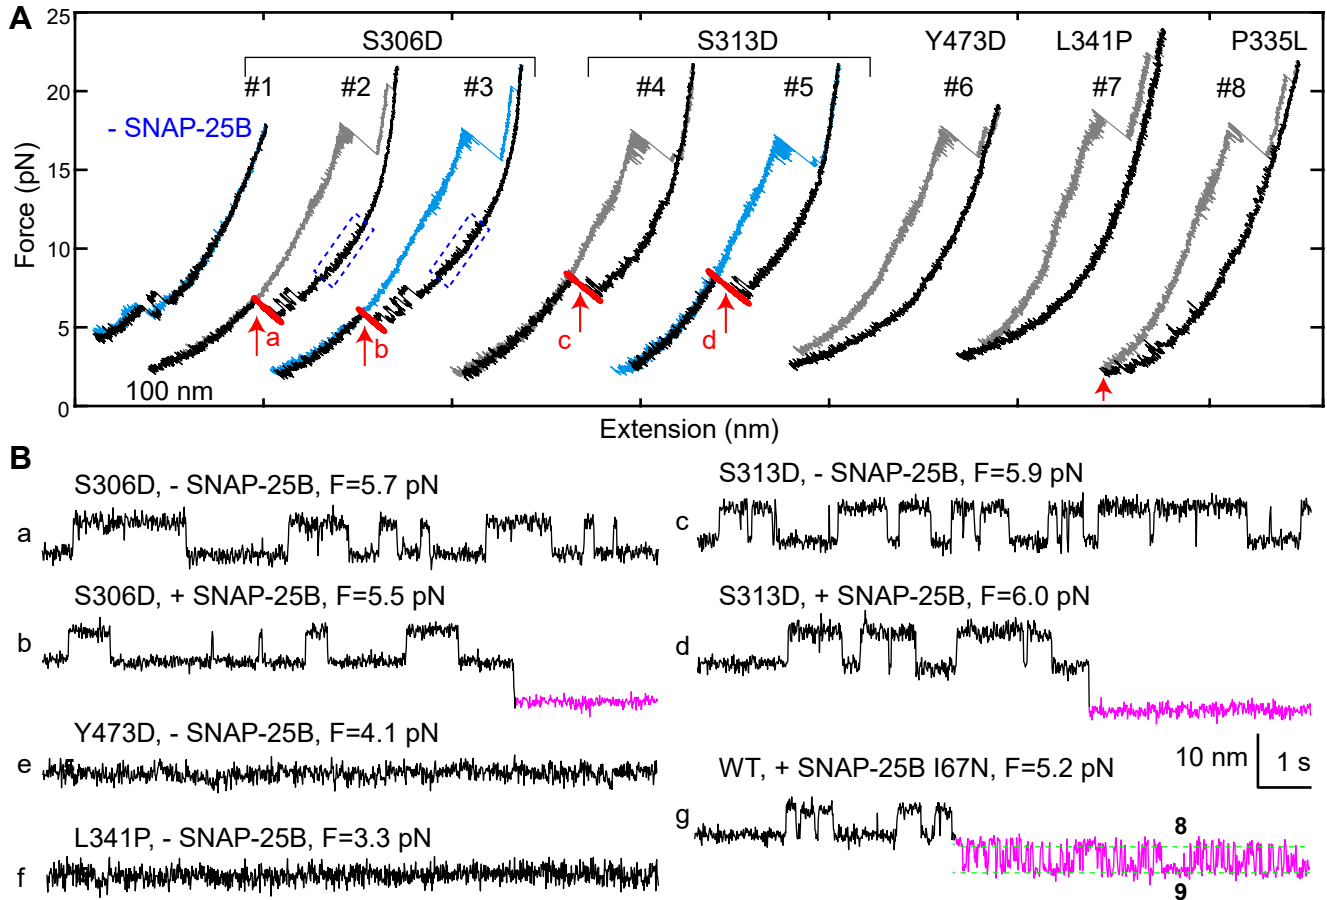

Figure 7

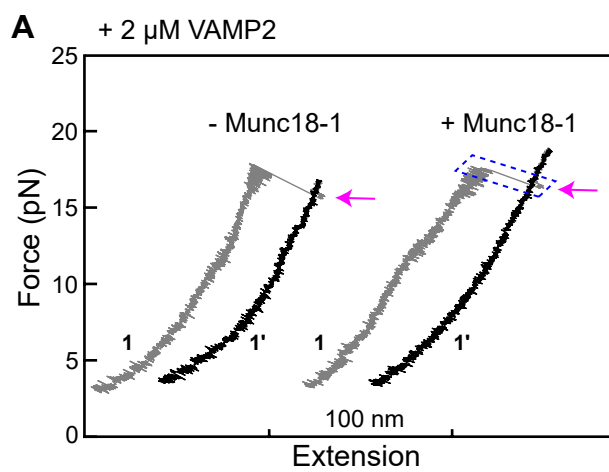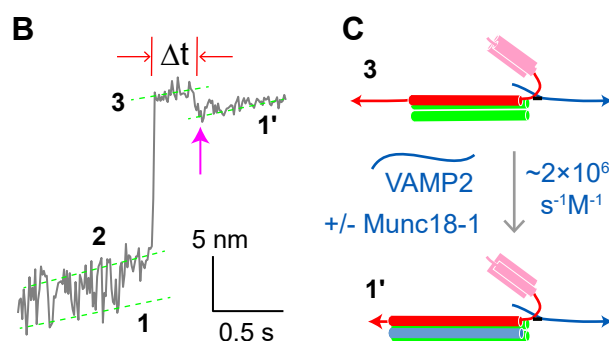

**Figure 8**

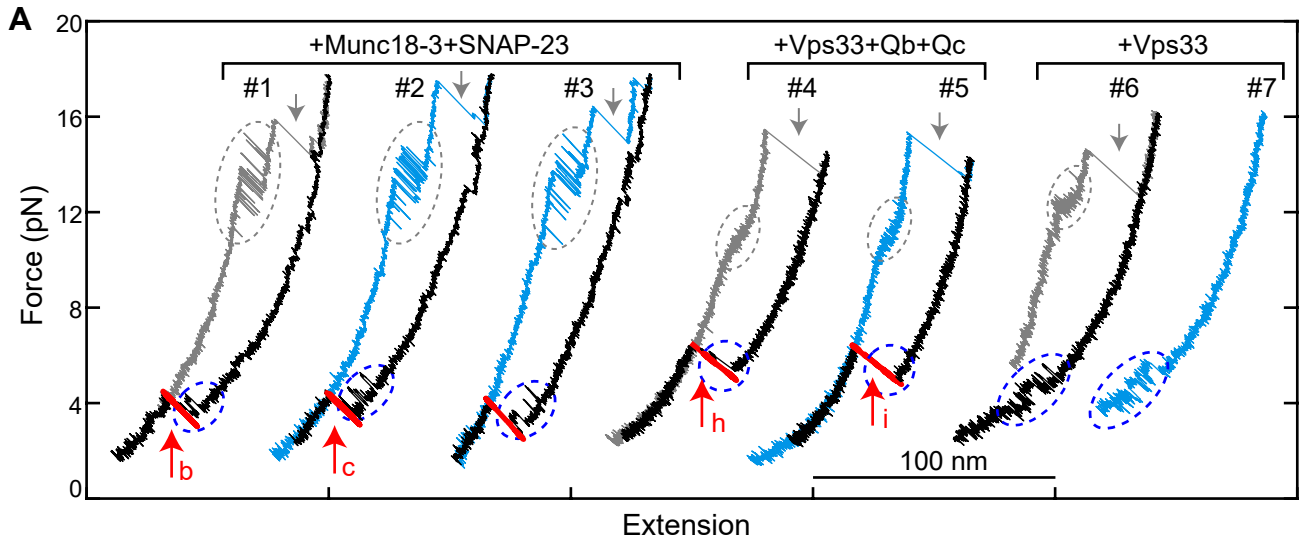

**B** Syntaxin-4 (Qa) - VAMP2 (R)

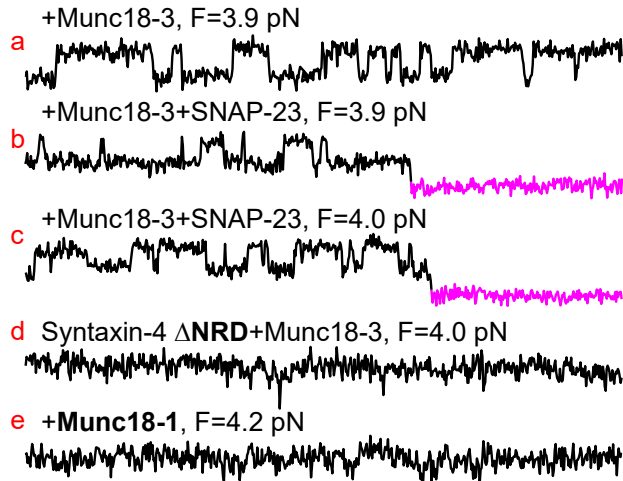

**C** Vam3 (Qa) - Nyv1 (R)

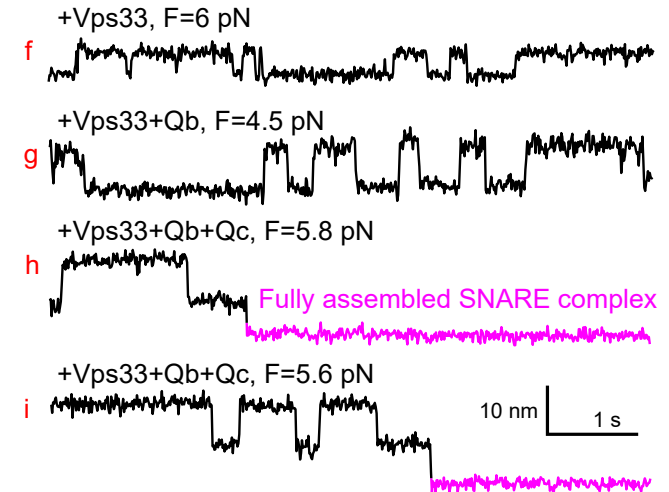



## Figure 2-figure supplement 1

### Neuronal SNAREs

| Domain        | NRD                  |  |  |  |  |  |  |  |  |  |  | NTD   |    |    |    |    |    |    |    | CTD |    |    |    |    |    |    |    |    |       |   |   |   |   |   |   |   |   |   |   |   |   |   |   |   |   |       |   |   |   |   |   |   |   |   |   |   |   |   |   |   |   |   |   |   |   |   |   |   |   |   |   |     |   |   |   |   |   |   |     |   |   |   |   |   |     |
|---------------|----------------------|--|--|--|--|--|--|--|--|--|--|-------|----|----|----|----|----|----|----|-----|----|----|----|----|----|----|----|----|-------|---|---|---|---|---|---|---|---|---|---|---|---|---|---|---|---|-------|---|---|---|---|---|---|---|---|---|---|---|---|---|---|---|---|---|---|---|---|---|---|---|---|---|-----|---|---|---|---|---|---|-----|---|---|---|---|---|-----|
| Layer #       |                      |  |  |  |  |  |  |  |  |  |  | -8    | -7 | -6 | -5 | -4 | -3 | -2 | -1 | 0   | 1  | 2  | 3  | 4  | 5  | 6  | 7  | 8  |       |   |   |   |   |   |   |   |   |   |   |   |   |   |   |   |   |       |   |   |   |   |   |   |   |   |   |   |   |   |   |   |   |   |   |   |   |   |   |   |   |   |   |     |   |   |   |   |   |   |     |   |   |   |   |   |     |
| VAMP2 #       |                      |  |  |  |  |  |  |  |  |  |  | 25    | 29 | 32 | 35 | 39 | 42 | 46 | 49 | 53  | 56 | 60 | 63 | 67 | 70 | 74 | 77 | 81 | 84    |   |   |   |   |   |   |   |   |   |   |   |   |   |   |   |   |       |   |   |   |   |   |   |   |   |   |   |   |   |   |   |   |   |   |   |   |   |   |   |   |   |   |     |   |   |   |   |   |   |     |   |   |   |   |   |     |
| VAMP2 (R)     | MS...EGGPPAPPNLT     |  |  |  |  |  |  |  |  |  |  | S     | N  | R  | L  | Q  | Q  | T  | Q  | A   | Q  | V  | D  | E  | V  | D  | I  | M  | R     | V | N | V | D | K | V | L | E | R | D | Q | K | L | S | E | L | D     | D | R | A | D | A | L | Q | A | G | A | S | Q | F | E | T | S | A | A | K | L | K | R | K | Y | W | W   | K | N | L | K | M | M | ... | L | C | T |   |   |     |
| Qa            |                      |  |  |  |  |  |  |  |  |  |  | I187C |    |    |    |    |    |    |    |     |    |    |    |    |    |    |    |    | R198C |   |   |   |   |   |   |   |   |   |   |   |   |   |   |   |   | L205C |   |   |   |   |   |   |   |   |   |   |   |   |   |   |   |   |   |   |   |   |   |   |   |   |   |     |   |   |   |   |   |   |     |   |   |   |   |   |     |
| Syntaxin-1A   | MKDR...SISKQALSEIETR |  |  |  |  |  |  |  |  |  |  | H     | S  | E  | I  | I  | K  | L  | E  | N   | S  | T  | R  | E  | L  | H  | D  | M  | F     | M | D | M | A | M | L | V | E | S | Q | G | E | M | I | D | R | I     | E | Y | N | V | E | H | A | V | D | Y | V | E | R | A | V | S | D | T | K | K | A | V | K | Y | Q | S   | K | A | R | R | K | K | ... | Q | K | I |   |   |     |
| Syntaxin-1A # | 1                    |  |  |  |  |  |  |  |  |  |  | 187   |    |    |    |    |    |    |    |     |    |    |    |    |    |    |    |    | 198   |   |   |   |   |   |   |   |   |   |   |   |   |   |   |   |   | 265   |   |   |   |   |   |   |   |   |   |   |   |   |   |   |   |   |   |   |   |   |   |   |   |   |   |     |   |   |   |   |   |   |     |   |   |   |   |   |     |
| SNAP-25B #    | 1                    |  |  |  |  |  |  |  |  |  |  |       |    |    |    |    |    |    |    |     |    |    |    |    |    |    |    |    | 95    |   |   |   |   |   |   |   |   |   |   |   |   |   |   |   |   |       |   |   |   |   |   |   |   |   |   |   |   |   |   |   |   |   |   |   |   |   |   |   |   |   |   |     |   |   |   |   |   |   |     |   |   |   |   |   |     |
| SN1 (Qb)      | MA...QRRADQLADES     |  |  |  |  |  |  |  |  |  |  | L     | E  | S  | L  | E  | S  | T  | R  | R   | M  | L  | Q  | L  | V  | E  | E  | S  | K     | D | A | G | I | R | T | L | V | M | L | D | E | Q | G | E | Q | L     | E | R | T | E | E | G | M | D | Q | I | N | K | D | M | K | E | A | E | K | N | L | T | D | L | G | K   | F | S | G | L | S | V | S   | P | S | N | K | L | ... |
| SN2 (Qc)      | AR...RVTNDARENEM     |  |  |  |  |  |  |  |  |  |  | D     | E  | N  | T  | E  | Q  | V  | S  | G   | I  | T  | G  | N  | I  | R  | H  | M  | A     | L | D | M | G | N | E | T | D | T | Q | N | R | Q | I | D | R | I     | M | E | K | A | D | S | N | K | T | R | I | D | E | A | N | Q | R | A | T | K | M | L | G | S | G | ... |   |   |   |   |   |   |     |   |   |   |   |   |     |
| SNAP-25B #    | 118                  |  |  |  |  |  |  |  |  |  |  |       |    |    |    |    |    |    |    |     |    |    |    |    |    |    |    |    | 206   |   |   |   |   |   |   |   |   |   |   |   |   |   |   |   |   |       |   |   |   |   |   |   |   |   |   |   |   |   |   |   |   |   |   |   |   |   |   |   |   |   |   |     |   |   |   |   |   |   |     |   |   |   |   |   |     |

### Rat GLUT4 SNAREs

|                |                      |  |  |  |  |  |  |  |  |  |  |     |    |    |    |    |    |    |    |    |    |    |    |    |    |    |    |    |     |   |   |   |   |   |   |   |   |   |   |   |   |   |   |   |   |     |   |   |   |   |   |   |   |   |   |   |   |   |   |   |   |   |   |   |   |   |   |     |   |   |   |   |   |   |   |   |     |   |     |   |   |   |   |     |
|----------------|----------------------|--|--|--|--|--|--|--|--|--|--|-----|----|----|----|----|----|----|----|----|----|----|----|----|----|----|----|----|-----|---|---|---|---|---|---|---|---|---|---|---|---|---|---|---|---|-----|---|---|---|---|---|---|---|---|---|---|---|---|---|---|---|---|---|---|---|---|---|-----|---|---|---|---|---|---|---|---|-----|---|-----|---|---|---|---|-----|
| VAMP2 #        |                      |  |  |  |  |  |  |  |  |  |  | 25  | 29 | 32 | 35 | 39 | 42 | 46 | 49 | 53 | 56 | 60 | 63 | 67 | 70 | 74 | 77 | 81 | 84  |   |   |   |   |   |   |   |   |   |   |   |   |   |   |   |   |     |   |   |   |   |   |   |   |   |   |   |   |   |   |   |   |   |   |   |   |   |   |     |   |   |   |   |   |   |   |   |     |   |     |   |   |   |   |     |
| VAMP2 (R)      | MS...EGGPPAPPNLT     |  |  |  |  |  |  |  |  |  |  | S   | N  | R  | L  | Q  | Q  | T  | Q  | A  | Q  | V  | D  | E  | V  | D  | I  | M  | R   | V | N | V | D | K | V | L | E | R | D | Q | K | L | S | E | L | D   | D | R | A | D | A | L | Q | A | G | A | S | Q | F | E | T | S | A | A | K | L | K | R   | K | Y | W | W | K | N | L | K | M   | M | ... | L | C | T |   |     |
| Syntaxin-4     | MKDR...QVTRQALNEISAR |  |  |  |  |  |  |  |  |  |  | H   | S  | E  | I  | I  | K  | L  | E  | N  | S  | T  | R  | E  | L  | H  | E  | I  | F   | T | F | L | A | T | E | V | E | M | Q | G | E | M | I | N | R | I   | E | K | N | L | S | A | D | Y | V | E | R | G | Q | E | H | V | K | I | A | L | E | N   | Q | K | K | A | R | K | K | K | ... | Q | K   | I |   |   |   |     |
| Syntaxin-4 # 1 | 1                    |  |  |  |  |  |  |  |  |  |  | 194 |    |    |    |    |    |    |    |    |    |    |    |    |    |    |    |    | 206 |   |   |   |   |   |   |   |   |   |   |   |   |   |   |   |   | 273 |   |   |   |   |   |   |   |   |   |   |   |   |   |   |   |   |   |   |   |   |   |     |   |   |   |   |   |   |   |   |     |   |     |   |   |   |   |     |
| SNAP-23 #      | 1                    |  |  |  |  |  |  |  |  |  |  |     |    |    |    |    |    |    |    |    |    |    |    |    |    |    |    |    | 90  |   |   |   |   |   |   |   |   |   |   |   |   |   |   |   |   |     |   |   |   |   |   |   |   |   |   |   |   |   |   |   |   |   |   |   |   |   |   |     |   |   |   |   |   |   |   |   |     |   |     |   |   |   |   |     |
| SN1 (Qb)       | MD...IQLRAHQVTD      |  |  |  |  |  |  |  |  |  |  | E   | S  | L  | E  | S  | T  | R  | R  | M  | L  | G  | L  | A  | I  | E  | S  | Q  | D   | A | G | I | K | T | I | T | M | L | D | E | Q | G | E | Q | L | N   | R | I | E | E | G | M | D | Q | I | N | K | D | M | R | E | A | E | K | T | I | T | E   | L | N | K | C | C | G | L | C | V   | C | P   | C | N | R | T | ... |
| SN2 (Qc)       | PQ...KRITNDAREDEME   |  |  |  |  |  |  |  |  |  |  | E   | N  | T  | E  | Q  | V  | S  | G  | I  | T  | G  | N  | I  | R  | H  | M  | A  | L   | D | M | G | N | E | T | D | A | Q | N | Q | I | Q | K | I | T | E   | K | A | D | T | N | K | N | R | I | D | I | A | N | T | R | A | K | L | I | D | S | ... |   |   |   |   |   |   |   |   |     |   |     |   |   |   |   |     |
| SNAP-23 #      | 127                  |  |  |  |  |  |  |  |  |  |  |     |    |    |    |    |    |    |    |    |    |    |    |    |    |    |    |    | 210 |   |   |   |   |   |   |   |   |   |   |   |   |   |   |   |   |     |   |   |   |   |   |   |   |   |   |   |   |   |   |   |   |   |   |   |   |   |   |     |   |   |   |   |   |   |   |   |     |   |     |   |   |   |   |     |

### Yeast vacuolar SNAREs

|           |                 |  |  |  |  |  |  |  |  |  |  |     |   |   |   |   |   |   |   |   |   |   |   |   |   |   |   |   |     |   |   |   |   |   |   |   |   |   |   |   |   |   |   |   |   |   |   |   |   |   |   |   |   |   |   |   |   |   |   |   |   |   |   |   |     |   |   |     |   |   |   |   |   |     |   |     |   |   |   |
|-----------|-----------------|--|--|--|--|--|--|--|--|--|--|-----|---|---|---|---|---|---|---|---|---|---|---|---|---|---|---|---|-----|---|---|---|---|---|---|---|---|---|---|---|---|---|---|---|---|---|---|---|---|---|---|---|---|---|---|---|---|---|---|---|---|---|---|---|-----|---|---|-----|---|---|---|---|---|-----|---|-----|---|---|---|
| Nyv1 (R)  | GSSCGGGVENNGGDS |  |  |  |  |  |  |  |  |  |  | I   | N | S | V | Q | R | E | T | E | D | V | R | G | I | M | S | R | N   | I | E | G | L | E | R | G | E | R | T | D | L | I | V | D | K | T | D | R | L | G | G | S | A | R | E | F | R | L | R | S | R | G | L | K | R   | K | M | W   | W | K | N | V | K | ... | G | C   | K |   |   |
| Vam3 (Qa) | GSSCGGGLILEREEE |  |  |  |  |  |  |  |  |  |  | I   | R | N | I | E | Q | G | V | S | D | L | N | V | L | F | Q | Q | V   | A | Q | L | V | A | E | Q | G | E | V | L | D | T | I | E | R | N | V | E | A | V | G | D | D | T | R | G | A | D | R | E | L | R | A | A | A   | R | Y | Q   | K | R | A | R | S | R   | M | ... | Q | K | I |
| Vti1 (Qb) | GSM LDRSTQR     |  |  |  |  |  |  |  |  |  |  | L   | K | A | S | Q | A | A | E | T | E | A | I | G | A | S | M | L | A   | Q | L | Q | Q | R | E | V | T | A | N | T | R | I | I | Y | E | S | E | G | Y | V | D | R | S | I | K | S | L | K | G | I | A | R | R | M | ... |   |   |     |   |   |   |   |   |     |   |     |   |   |   |
| Vam7 (Qc) | GSKLDEQEEY      |  |  |  |  |  |  |  |  |  |  | V   | K | D | I | G | V | H | R | R | L | R | H | L | G | T | E | T | Y   | N | A | T | E | S | Q | K | D | D | L | D | T | L | D | Q | G | I | T | R | L | G | N | G | L | D | K | A | K | A | L | E | K | K | V | S | G   | R | A | ... |   |   |   |   |   |     |   |     |   |   |   |
|           |                 |  |  |  |  |  |  |  |  |  |  | 126 |   |   |   |   |   |   |   |   |   |   |   |   |   |   |   |   | 190 |   |   |   |   |   |   |   |   |   |   |   |   |   |   |   |   |   |   |   |   |   |   |   |   |   |   |   |   |   |   |   |   |   |   |   |     |   |   |     |   |   |   |   |   |     |   |     |   |   |   |
|           |                 |  |  |  |  |  |  |  |  |  |  | 181 |   |   |   |   |   |   |   |   |   |   |   |   |   |   |   |   | 252 |   |   |   |   |   |   |   |   |   |   |   |   |   |   |   |   |   |   |   |   |   |   |   |   |   |   |   |   |   |   |   |   |   |   |   |     |   |   |     |   |   |   |   |   |     |   |     |   |   |   |
|           |                 |  |  |  |  |  |  |  |  |  |  | 148 |   |   |   |   |   |   |   |   |   |   |   |   |   |   |   |   | 218 |   |   |   |   |   |   |   |   |   |   |   |   |   |   |   |   |   |   |   |   |   |   |   |   |   |   |   |   |   |   |   |   |   |   |   |     |   |   |     |   |   |   |   |   |     |   |     |   |   |   |

Figure 2-figure supplement 2

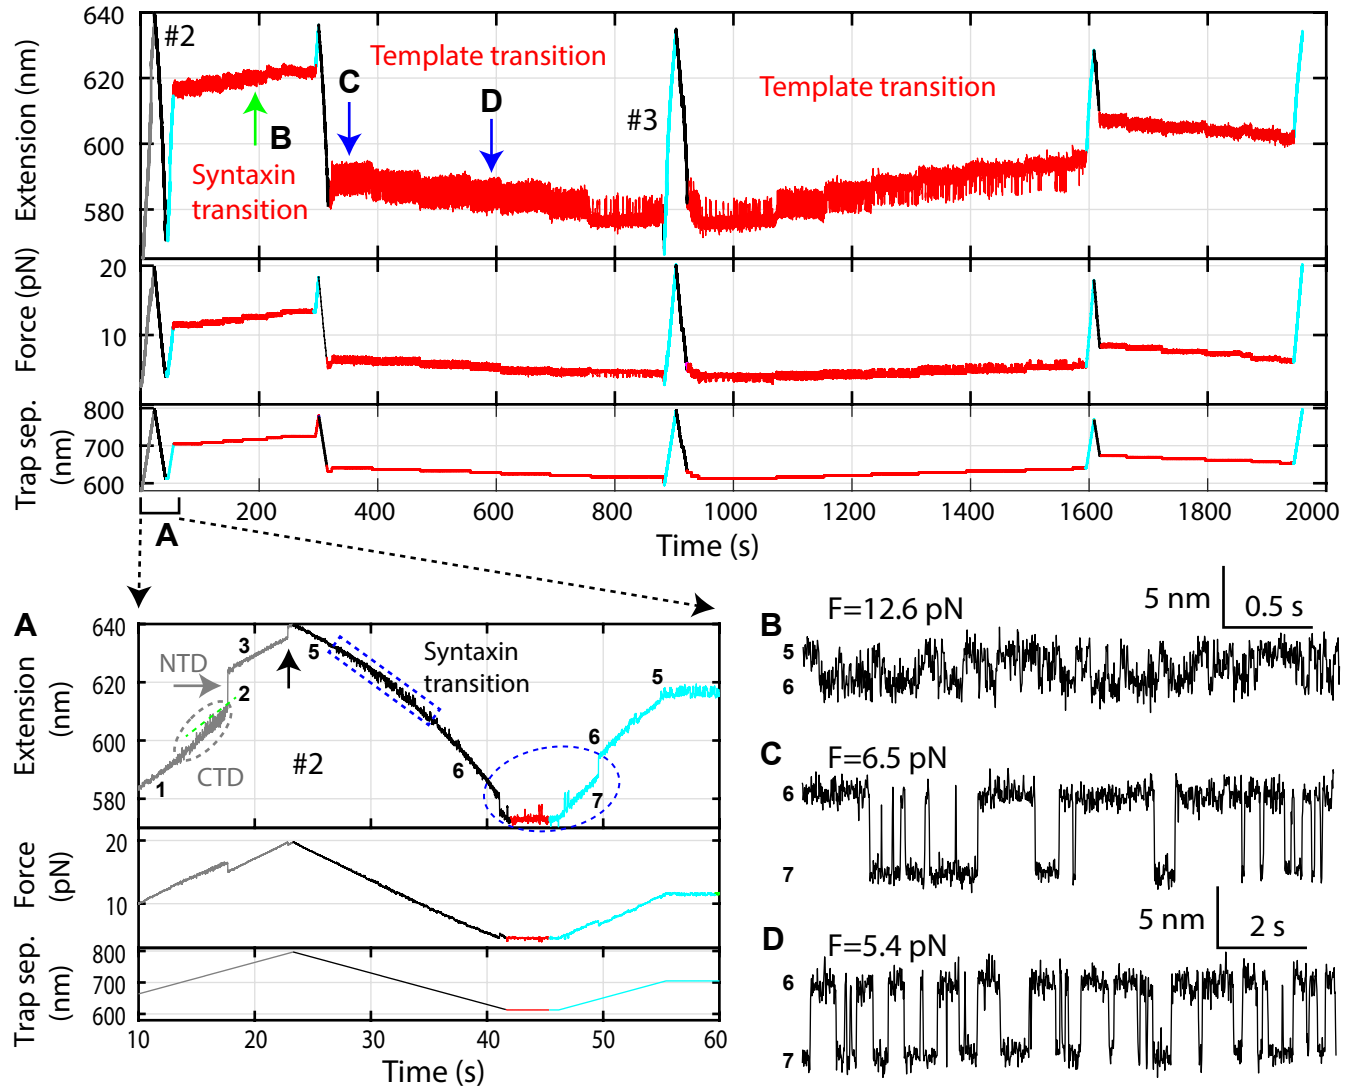

### Figure 2-figure supplement 3

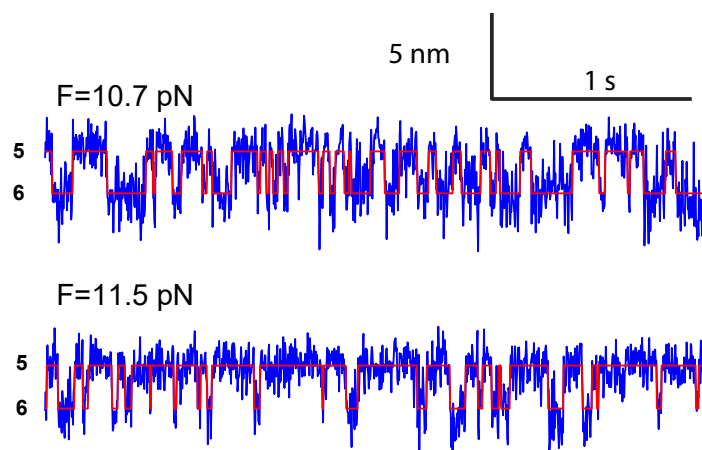

**Figure 2-figure supplement 4**

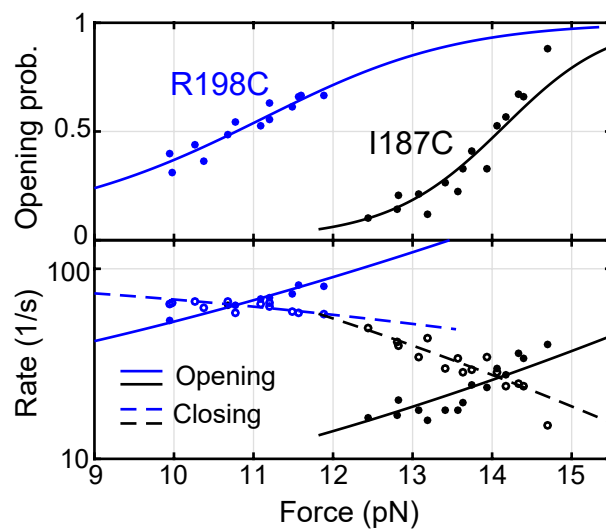

Figure 2-figure supplement 5

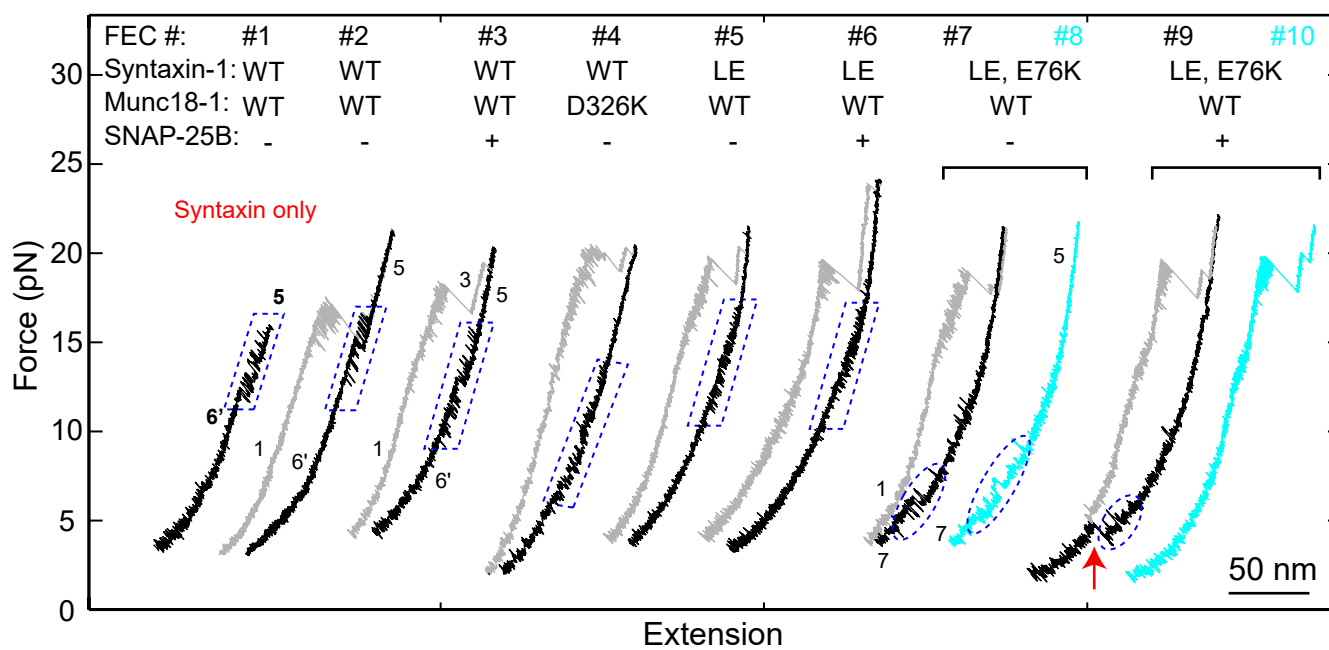

## Figure 2-figure supplement 6

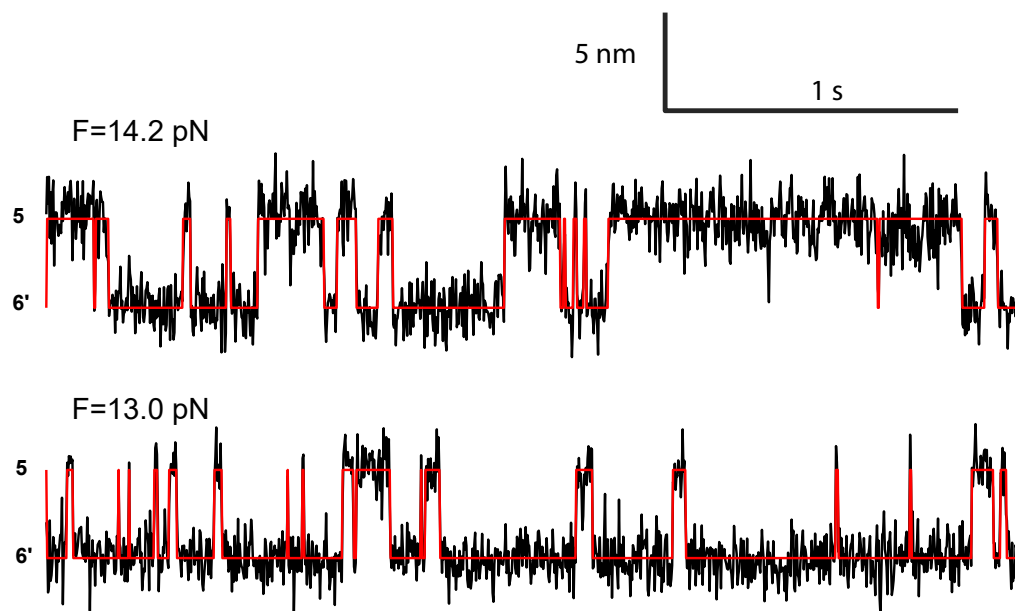

## Figure 2-figure supplement 7

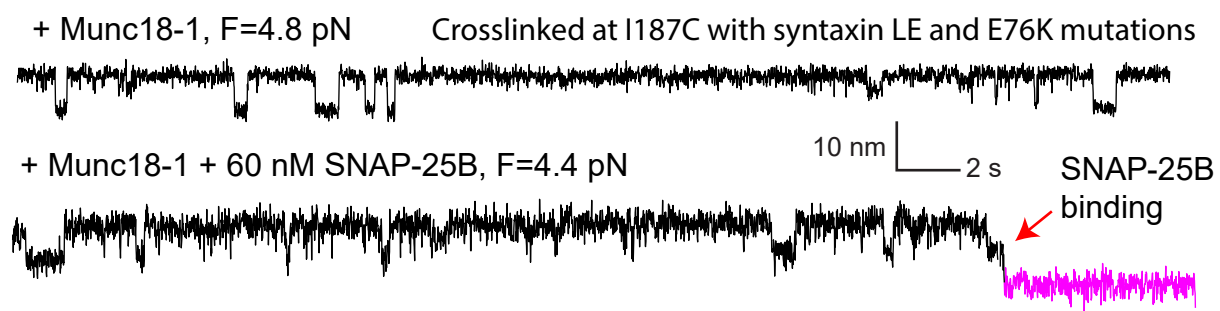

Figure 3-figure supplement 1

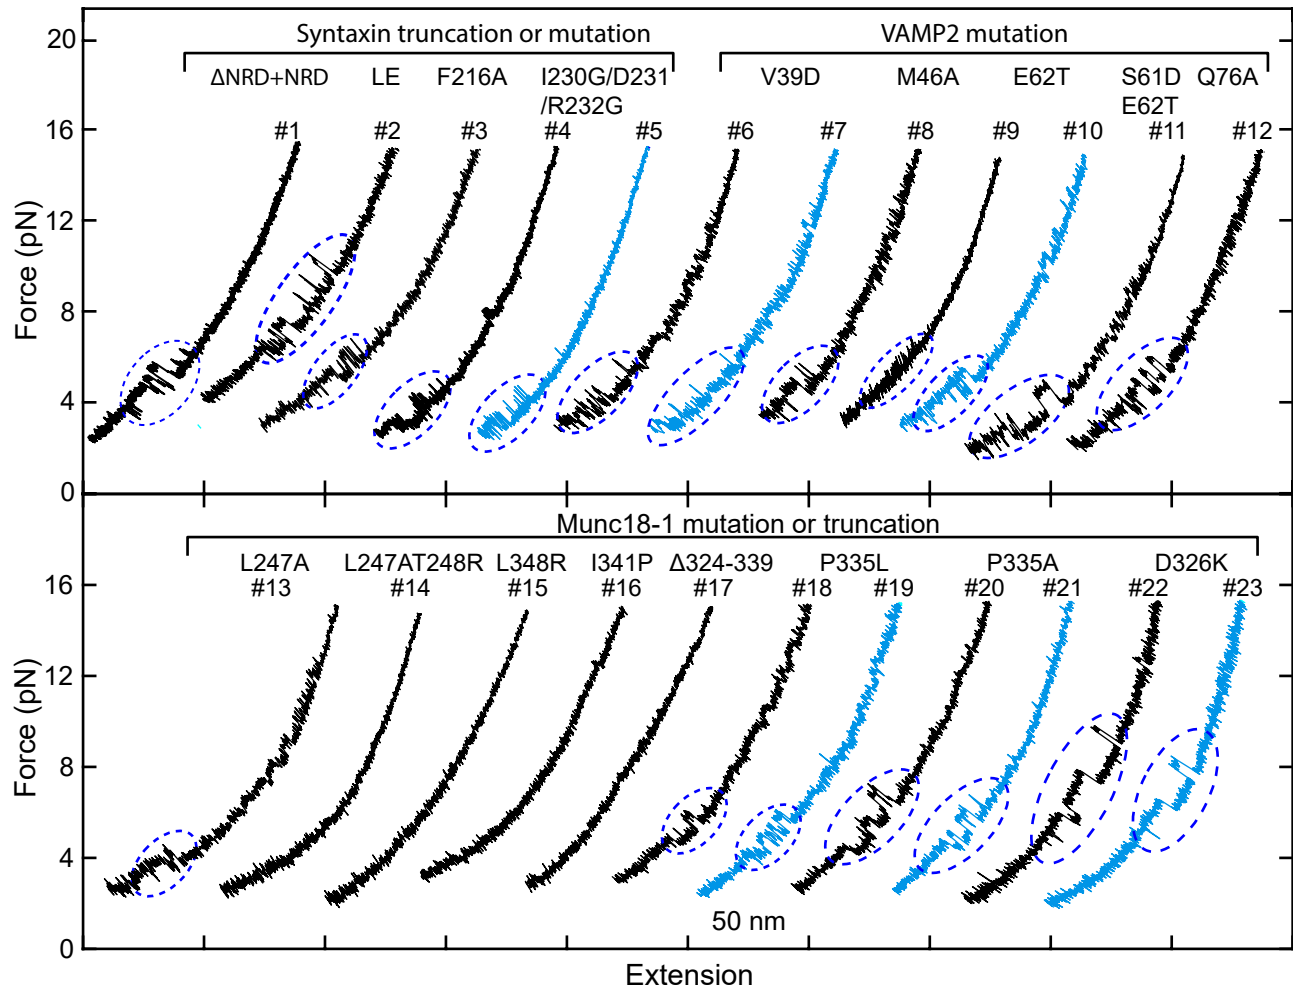



**Figure 3-figure supplement 2**

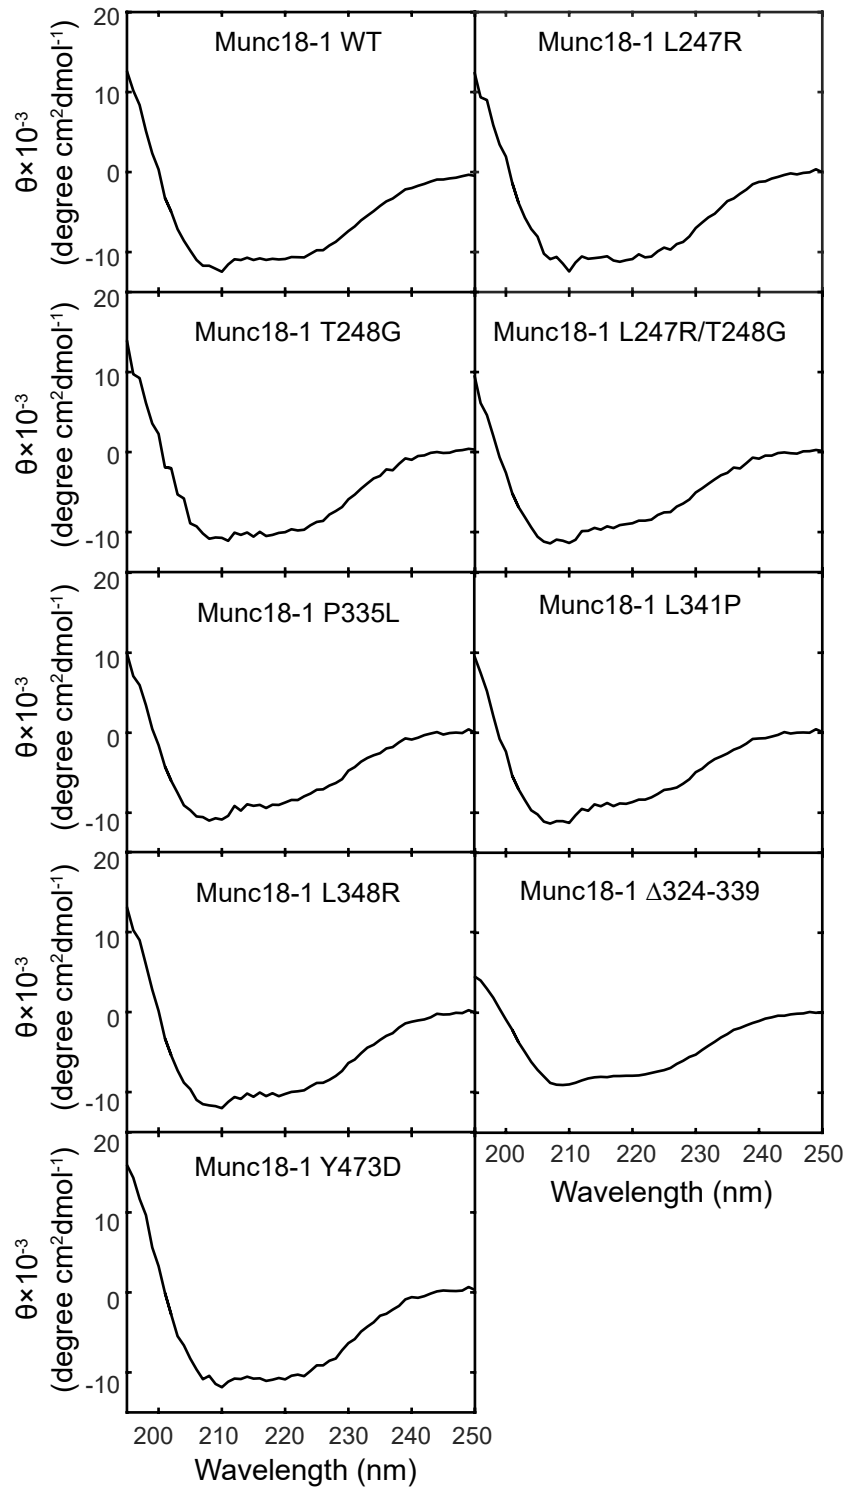

### Figure 3-figure supplement 3

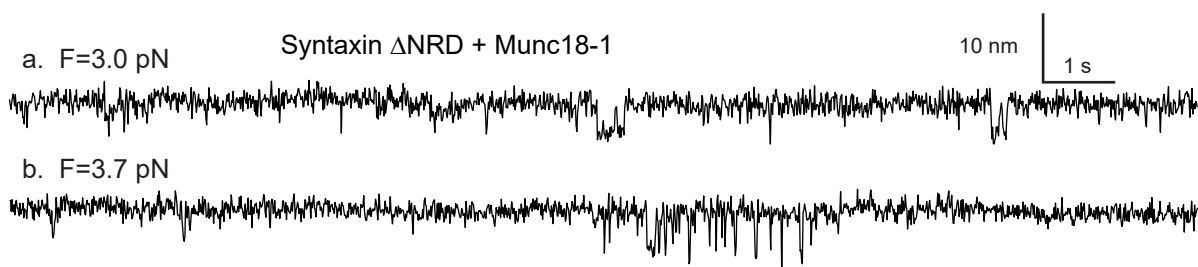

Figure 5-figure supplement 1

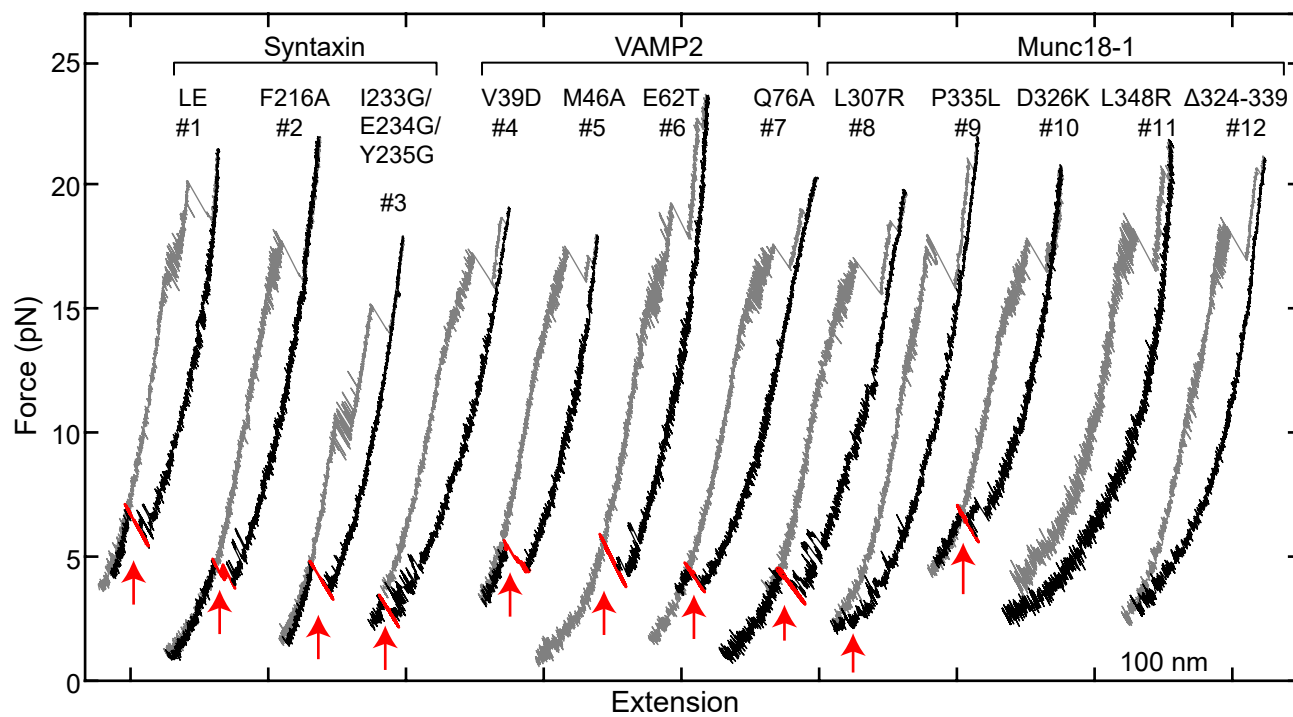

## Figure 5-figure supplement 2

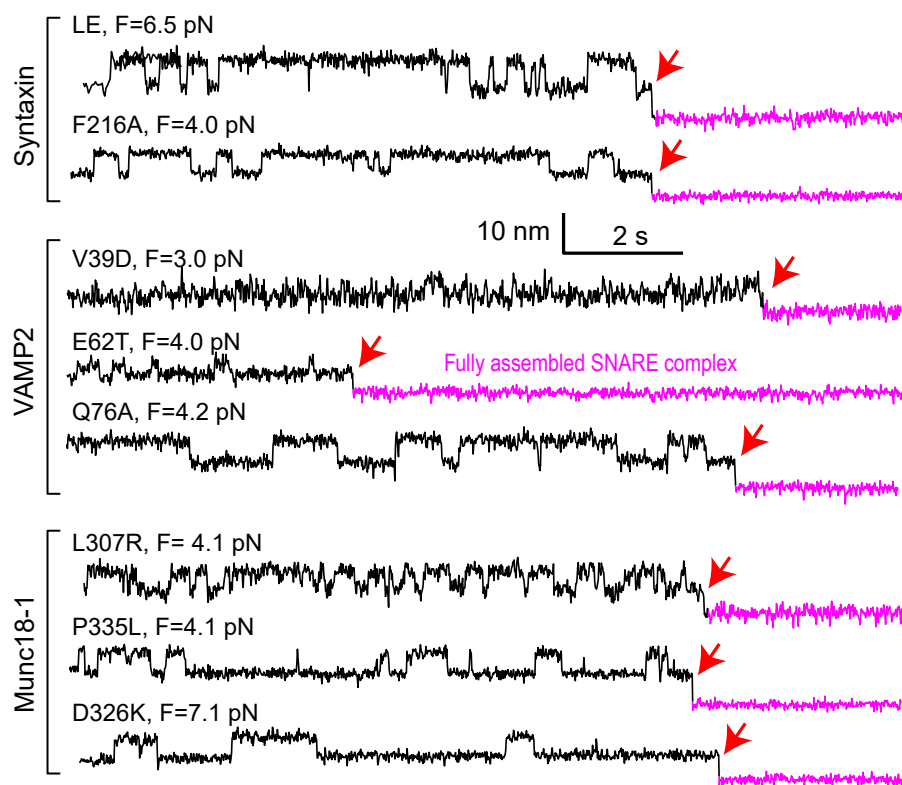

Figure 8-figure supplement 1

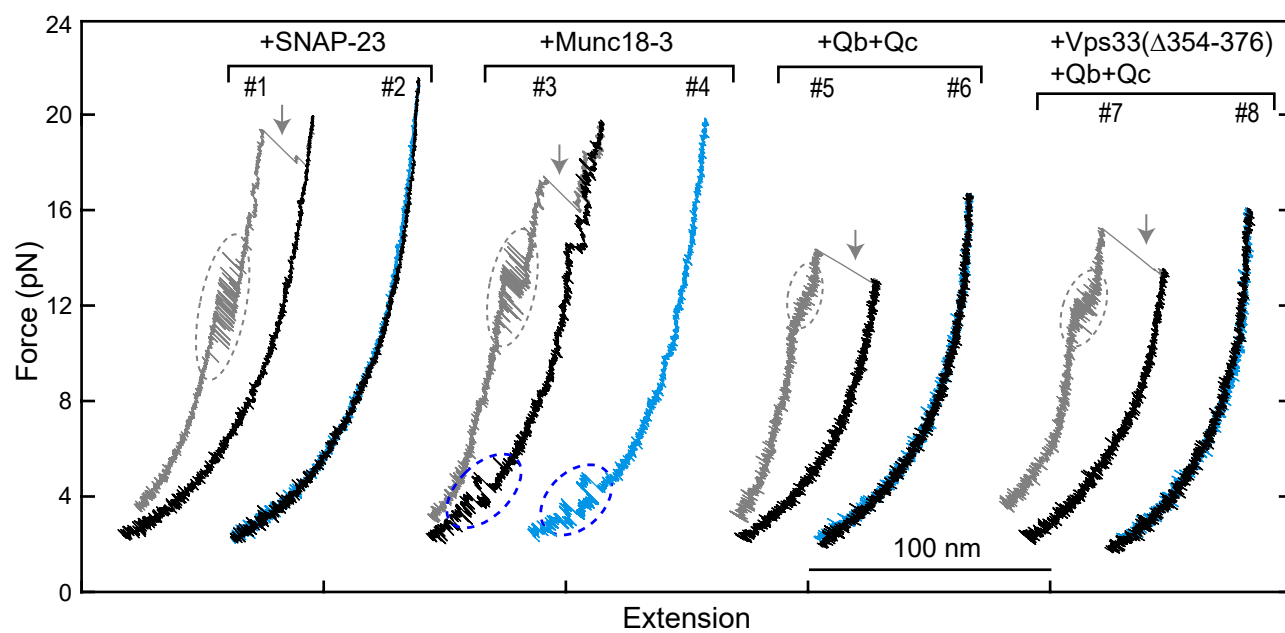

## Figure 8-figure supplement 2

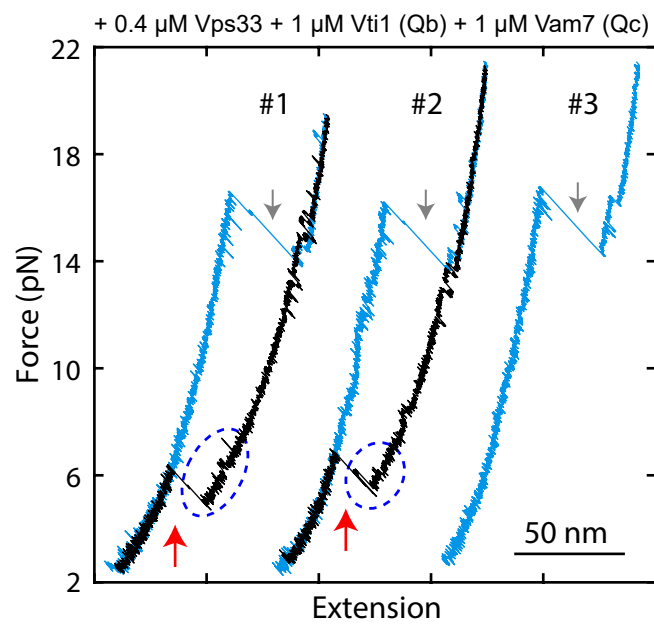

### Figure 8-figure supplement 3

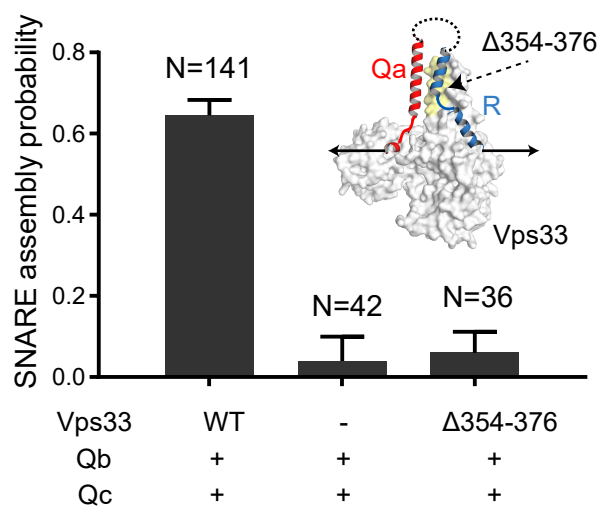

Source: http://biorxiv.org/content/10.1101/413724v1.full.pdf
